# Supplementary material
Source: publisher figshare collection journal article supplement (https://frontiersin.figshare.com/ndownloader/files/14669051)
Supplement: Supplementary file 1 [file 14669051]

## Sheet: AllData
msmt_datetime (LT)	geopoint:Accuracy	geopoint:Altitude	geopoint:Latitude	geopoint:Longitude	s4w_mm	cocorahs_mm	dhm_ml	dhm_mm	onset_mm	deltaTDays	s4w_corr_ecf_mm	s4w_corr_evap_mm	s4w_mm_sum	cocorahs_mm_sum	onset_mm_sum	dhm_mm_sum	s4w_corr_ecf_mm_sum	s4w_corr_evap_mm_sum
2017-05-01 16:17:00	4.9	1333.9	27.6496	85.3043	9	9.7	310.4	9.6		0	9.27	9	9	9.7		9.6	9.27	9
2017-05-03 16:20:00	4.6	1148.1	27.65	85.3049	0	0	0	0		2.00208	0	0	9	9.7		9.6	9.27	9
2017-05-05 08:48:00	5	1342.1	27.6495	85.3043	12	15.1	495	15.3		1.68611	12.36	12.8	21	24.8		24.9	21.63	21.8
2017-05-07 08:06:00	4.6	1347.1	27.6496	85.3044	8	9	290	8.9		1.97083	8.24	8.8	29	33.8		33.8	29.87	30.6
2017-05-08 08:57:00	4.4	1306.4	27.6495	85.3044	16	13.4	430	13.3		1.03542	16.48	16.5	45	47.2		47.1	46.35	47.1
2017-05-09 20:37:00	5	1345.4	27.6497	85.3044	4	4.4	141	4.3		1.48611	4.12	4.7	49	51.6		51.4	50.47	51.8
2017-05-10 20:29:00	5	1344.7	27.6496	85.3044	0	0	0	0		0.994444	0	0	49	51.6		51.4	50.47	51.8
2017-05-12 17:09:00	5	1352.9	27.6495	85.3045	2	2	72	2.2		1.86111	2.06	2.8	51	53.6		53.6	52.53	54.6
2017-05-13 10:13:00	5	1352.2	27.6495	85.3044	0	0	0	0		0.711111	0	0	51	53.6		53.6	52.53	54.6
2017-05-15 10:37:00	4.9	1356.1	27.6495	85.3043	0	0	0	0		2.01667	0	0	51	53.6		53.6	52.53	54.6
2017-05-16 05:08:00	5	1368.7	27.6494	85.3042	19	20.2	645	19.9		0.771528	19.57	19.4	70	73.8		73.5	72.1	74
2017-05-17 16:38:00	4.9	1329.6	27.6495	85.3045	4	4.6	150	4.6		1.47917	4.12	4.7	74	78.4		78.1	76.22	78.7
2017-05-18 16:40:00	5	1315.4	27.6494	85.3044	0	0	0	0		1.00139	0	0	74	78.4		78.1	76.22	78.7
2017-05-22 13:24:00	5	1332.9	27.6496	85.3043	2	3	100	3.1		3.86389	2.06	2.8	76	81.4		81.2	78.28	81.5
2017-05-23 15:48:00	4.5	1339.8	27.6496	85.3043	0	0	0	0		1.1	0	0	76	81.4		81.2	78.28	81.5
2017-06-03 17:57:00	4.8	1344.1	27.6495	85.3043	40	41	1282.5	39.5		11.0896	41.2	40.8	116	122.4		120.7	119.48	122.3
2017-06-06 18:28:00	4.3	1338.8	27.6496	85.3044	8	8.2	275	8.5		3.02153	8.24	8.8	124	130.6		129.2	127.72	131.1
2017-06-10 19:45:00	4.5	1401.3	27.6495	85.3044	8	8.4	280	8.6	9	4.05347	8.24	8.8	132	139	142.5	137.8	135.96	139.9
2017-06-13 17:09:00	4.7	1353.8	27.6496	85.3044	0	0	0	0	0.2	2.89167	0	0	132	139	142.7	137.8	135.96	139.9
2017-06-16 07:50:00	4.6	1348.4	27.6495	85.3044	0	0	0	0	0	2.61181	0	0	132	139	142.7	137.8	135.96	139.9
2017-06-20 09:48:00	5	1336.7	27.6496	85.3044	0	0.3	15	0.5	0.6	4.08194	0	0	132	139.3	143.3	138.3	135.96	139.9
2017-06-21 07:02:00	4.7	1325	27.6496	85.3045	18	20.8	667	20.6	21.8	0.884722	18.54	18.4	150	160.1	165.1	158.9	154.5	158.3
2017-06-23 06:50:00	4.9	1350.5	27.6496	85.3044	3	3.2	100	3.1	3.8	1.99167	3.09	3.8	153	163.3	168.9	162	157.59	162.1
2017-06-24 11:32:00	4.9	1338.1	27.6497	85.3045	70	70.2	2320	71.5	80.2	1.19583	72.1	70.6	223	233.5	249.1	233.5	229.69	232.7
2017-06-25 08:37:00	4.8	1325.5	27.6495	85.3045	14	14.6	477	14.7	16.4	0.878472	14.42	14.4	237	248.1	265.5	248.2	244.11	247.1
2017-06-26 07:56:00	4.6	1365.1	27.6494	85.3045	42	41	1330	41	47	0.971528	43.26	42.5	279	289.1	312.5	289.2	287.37	289.6
2017-06-27 07:21:00	5	1340.2	27.6496	85.3046	0	0	0	0	0.4	0.975694	0	0	279	289.1	312.9	289.2	287.37	289.6
2017-06-28 06:34:00	4.7	1288.1	27.6495	85.3044	1	1.3	45	1.4	1	0.967361	1.03	1.5	280	290.4	313.9	290.6	288.4	291.1
2017-06-29 08:24:00	4.7	1345.7	27.6495	85.3045	1	1.4	47	1.4	1.6	1.07639	1.03	1.5	281	291.8	315.5	292	289.43	292.6
2017-07-02 20:41:00	4.9	1335.3	27.6496	85.3043	2	4.2	138	4.3	4.6	3.51181	2.06	2.8	283	296	320.1	296.3	291.49	295.4
2017-07-03 07:34:00	4.9	1270.8	27.6493	85.3044	0	0	0	0	0	0.453472	0	0	283	296	320.1	296.3	291.49	295.4
2017-07-04 12:40:00	4.8	1334.1	27.6496	85.3045	30	31	1010	31.1	35.4	1.2125	30.9	30.6	313	327	355.5	327.4	322.39	326
2017-07-05 12:34:00	4.3	1339.5	27.6496	85.3044	3	2.6	80	2.5	2.2	0.995833	3.09	3.5	316	329.6	357.7	329.9	325.48	329.5
2017-07-06 11:09:00	4.7	1344.2	27.6497	85.3045	15	15.6	510	15.7	17	0.940972	15.45	15.5	331	345.2	374.7	345.6	340.93	345
2017-07-07 19:10:00	4.5	1343.3	27.6496	85.3045	5	4.1	130	4	4.6	1.33403	5.15	5.7	336	349.3	379.3	349.6	346.08	350.7
2017-07-10 18:16:00	5	1386	27.6492	85.3046	24	25.2	840	25.9	29.2	2.9625	24.72	24.8	360	374.5	408.5	375.5	370.8	375.5
2017-07-12 18:22:00	4.8	1338.9	27.6496	85.3044	1	1.2	30	0.9	0.8	2.00417	1.03	1.8	361	375.7	409.3	376.4	371.83	377.3
2017-07-16 18:38:00	4.7	1337.2	27.6496	85.3044	15	16	515	15.9	18.2	4.01111	15.45	15.8	376	391.7	427.5	392.3	387.28	393.1
2017-07-19 15:47:00	4.8	1333.2	27.6495	85.3045	9	10.8	355	10.9	11.2	2.88125	9.27	9.8	385	402.5	438.7	403.2	396.55	402.9
2017-07-21 19:08:00	4.9	1237.2	27.6495	85.304	8	7.6	240	7.4	7.6	2.13958	8.24	8.8	393	410.1	446.3	410.6	404.79	411.7
2017-07-22 16:50:00	5	1353.3	27.6496	85.3045	17	17.3	537	16.6	19.2	0.904167	17.51	17.5	410	427.4	465.5	427.2	422.3	429.2
2017-07-23 09:28:00	5	1337.4	27.6496	85.3044	11	10.8	350	10.8	11.6	0.693056	11.33	11.3	421	438.2	477.1	438	433.63	440.5
2017-07-24 07:19:00	5	1333.1	27.6495	85.3045	16	15.6	502	15.5	16.2	0.910417	16.48	16.5	437	453.8	493.3	453.5	450.11	457
2017-07-26 20:05:00	5	1359.4	27.6495	85.3045	14	14.4	462	14.2	15.4	2.53194	14.42	14.8	451	468.2	508.7	467.7	464.53	471.8
2017-07-28 19:23:00	4.5	1355.6	27.6495	85.3044	0	0	0	0	0	1.97083	0	0	451	468.2	508.7	467.7	464.53	471.8
2017-07-30 08:01:00	4.8	1340.7	27.6495	85.3045	13	13.5	437	13.5	14.4	1.52639	13.39	13.8	464	481.7	523.1	481.2	477.92	485.6
2017-07-31 07:59:00	4.8	1330.2	27.6495	85.3045	0	0	0	0	0	0.998611	0	0	464	481.7	523.1	481.2	477.92	485.6
2017-08-01 08:12:00	4.9	1344.5	27.6495	85.3044	0	0	0	0	0	1.00903	0	0	464	481.7	523.1	481.2	477.92	485.6
2017-08-02 08:24:00	4.6	1336	27.6495	85.3044	9	9.8	315	9.7	9.8	1.00833	9.27	9.5	473	491.5	532.9	490.9	487.19	495.1
2017-08-03 21:31:00	4.9	1373.2	27.6494	85.3044	16	16.8	548	16.9	18.2	1.54653	16.48	16.8	489	508.3	551.1	507.8	503.67	511.9
2017-08-06 08:27:00	5	1325.7	27.6496	85.3044	10	10.6	340	10.5	11.8	2.45556	10.3	10.8	499	518.9	562.9	518.3	513.97	522.7
2017-08-07 07:43:00	4.9	1348.3	27.6495	85.3044	8	7.4	238	7.3	8.4	0.969444	8.24	8.5	507	526.3	571.3	525.6	522.21	531.2
2017-08-08 08:20:00	4.2	1340.2	27.6496	85.3045	0	0.4	11	0.3	0.2	1.02569	0	0	507	526.7	571.5	525.9	522.21	531.2
2017-08-09 10:58:00	4.9	1361.3	27.6496	85.3044	0	0	0	0	0.8	1.10972	0	0	507	526.7	572.3	525.9	522.21	531.2
2017-08-10 10:53:00	5	1358.5	27.6496	85.3044	0	0.8	25	0.8	0.6	0.996528	0	0	507	527.5	572.9	526.7	522.21	531.2
2017-08-14 18:37:00	5	1370.8	27.6495	85.3043	84	85.4	2265	86	95	4.32222	86.52	84.8	591	612.9	667.9	612.7	608.73	616
2017-08-16 16:37:00	4.9	1357.8	27.6496	85.3044	0	0	0	0	0	1.91667	0	0	591	612.9	667.9	612.7	608.73	616
2017-08-17 17:41:00	5	1364.7	27.6496	85.3045	11	10.2	315	9.7	10.6	1.04444	11.33	11.5	602	623.1	678.5	622.4	620.06	627.5
2017-08-18 17:57:00	4.5	1232.7	27.6499	85.3045	1	1	30	0.9	0.8	1.01111	1.03	1.5	603	624.1	679.3	623.3	621.09	629
2017-08-19 12:01:00	5	1135.5	27.6496	85.3041	27	27.3	884	27.3	29.4	0.752778	27.81	27.4	630	651.4	708.7	650.6	648.9	656.4
2017-08-20 18:40:00	4.6	1361	27.6495	85.3044	0	0.6	19	0.6	0.4	1.27708	0	0	630	652	709.1	651.2	648.9	656.4
2017-08-22 21:39:00	4.8	1345.1	27.6495	85.3045	4	4	125	3.9	3.8	2.12431	4.12	4.8	634	656	712.9	655.1	653.02	661.2
2017-08-25 22:13:00	4.5	1358.2	27.6496	85.3044	8	7.7	245	7.6	8.4	3.02361	8.24	8.8	642	663.7	721.3	662.7	661.26	670
2017-08-27 09:51:00	4.8	1368.2	27.6496	85.3045	2	1.6	50	1.5	2	1.48472	2.06	2.7	644	665.3	723.3	664.2	663.32	672.7
2017-08-28 10:23:00	4.9	1278.2	27.6497	85.3044	8	7.6	250	7.7	8.8	1.02222	8.24	8.5	652	672.9	732.1	671.9	671.56	681.2
2017-08-29 06:33:00	4.7	1332.1	27.6496	85.3044	0	0	0	0	0	0.840278	0	0	652	672.9	732.1	671.9	671.56	681.2
2017-08-31 13:51:00	5	1345.5	27.6496	85.3045	47	46.8	1520	46.9	54.6	2.30417	48.41	47.8	699	719.7	786.7	718.8	719.97	729
2017-09-01 08:37:00	4.8	1346.7	27.6496	85.3045	10	9.8	318	9.8	11.4	0.781944	10.3	10.4	709	729.5	798.1	728.6	730.27	739.4
2017-09-04 07:34:00	5	1339.5	27.6497	85.3044	6	5	161	5	5	2.95625	6.18	6.8	715	734.5	803.1	733.6	736.45	746.2
2017-09-05 16:59:00	5	1329.7	27.6496	85.3045	0	0.2	10	0.3	0.2	1.39236	0	0	715	734.7	803.3	733.9	736.45	746.2
2017-09-06 07:07:00	4.7	1315.4	27.6495	85.3044	0	0	0	0	0	0.588889	0	0	715	734.7	803.3	733.9	736.45	746.2
2017-09-08 08:46:00	4.6	1350.4	27.6496	85.3044	0	0	0	0	0	2.06875	0	0	715	734.7	803.3	733.9	736.45	746.2
2017-09-11 08:42:00	4.9	1341.4	27.6496	85.3044	0	0	0	0	0	2.99722	0	0	715	734.7	803.3	733.9	736.45	746.2
2017-09-12 07:35:00	4.7	1346.3	27.6496	85.3045	12	12.6	402	12.4	14.8	0.953472	12.36	12.5	727	747.3	818.1	746.3	748.81	758.7
2017-09-18 13:58:00	7.3	1343.8	27.6496	85.3045	32	33.2	1065	32.8	34.8	6.26597	32.96	32.8	759	780.5	852.9	779.1	781.77	791.5
2017-09-20 18:03:00	7.3	1356.3	27.6496	85.3044	5	4	127	3.9	4.6	2.17014	5.15	5.8	764	784.5	857.5	783	786.92	797.3
2017-09-26 20:19:00	7.3	1354.7	27.6496	85.3044	29	30	898	27.7	34	6.09444	29.87	29.8	793	814.5	891.5	810.7	816.79	827.1
2017-10-17 23:09:12	5	1320.4	27.6495	85.3044	0	1.6	60	1.9	2.4	21.1182	0	0	793	816.1	893.9	812.6	816.79	827.1
2017-10-30 08:55:00	4	1333.56	27.6496	85.3045	0	0	0	0	0	12.4068	0	0	793	816.1	893.9	812.6	816.79	827.1
2017-11-15 11:00:00	3	1304	27.6496	85.3044	0	0	0	0	0.2	16.0868	0	0	793	816.1	894.1	812.6	816.79	827.1
2017-11-18 18:23:00	5	1301	27.6496	85.3045	0	0	0	0	0	3.30764	0	0	793	816.1	894.1	812.6	816.79	827.1
2018-01-30 16:51:00	4	1325.31	27.6497	85.3045	5	5.7	184	5.7		72.9361	5.15	5.8	798	821.8		818.3	821.94	832.9
2018-02-07 23:31:00	8	1349.21	27.6497	85.3041	0	0	0	0		8.27778	0	0	798	821.8		818.3	821.94	832.9
2018-02-27 15:57:00	4	1298.56	27.6496	85.3045	0	1.2	45	1.4		19.6847	0	0	798	823		819.7	821.94	832.9
2018-03-11 14:01:00	10	1319.14	27.6496	85.3045	0	0.5	17	0.5		11.9194	0	0	798	823.5		820.2	821.94	832.9
2018-03-12 10:30:00	10	1341.09	27.6496	85.3044	25	25.6	867	26.7		0.853472	25.75	25.4	823	849.1		846.9	847.69	858.3
2018-03-16 10:26:00	10	1341.4	27.6496	85.3044	3	2.9	91	2.8		3.99722	3.09	3.8	826	852		849.7	850.78	862.1
2018-03-30 08:00:00	24.347	0	27.6495	85.3045	1	0.9	32	1		13.8986	1.03	1.8	827	852.9		850.7	851.81	863.9
2018-04-03 11:54:00	10	1294.7	27.6496	85.3044	3	3.4	105	3.2		4.1625	3.09	3.8	830	856.3		853.9	854.9	867.7
2018-04-05 08:31:00	10	1343.01	27.6495	85.3044	15	14.2	455	14		1.85903	15.45	15.8	845	870.5		867.9	870.35	883.5
2018-04-09 07:27:00	10	1294.86	27.6496	85.3044	2	1.9	55	1.7		3.95556	2.06	2.8	847	872.4		869.6	872.41	886.3
2018-04-11 08:50:00	4	1307.09	27.6495	85.3044	3	2.8	84	2.6		2.05764	3.09	3.8	850	875.2		872.2	875.5	890.1
2018-04-13 10:26:00	4	1331.47	27.6495	85.3044	0	1	30	0.9		2.06667	0	0	850	876.2		873.1	875.5	890.1
2018-04-17 17:52:00	4	1322.31	27.6496	85.3044	6	6.5	230	7.1		4.30972	6.18	6.8	856	882.7		880.2	881.68	896.9
2018-04-21 10:33:00	4	1309.62	27.6496	85.3045	4	4.5	140	4.3		3.69514	4.12	4.8	860	887.2		884.5	885.8	901.7
2018-04-24 22:05:00	4	1350.66	27.6495	85.3044	0	0	0	0		3.48056	0	0	860	887.2		884.5	885.8	901.7
2018-04-28 22:56:12	4	1311.83	27.6495	85.3044	35	36.3	1185	36.5		4.03556	36.05	35.8	895	923.5		921	921.85	937.5
2018-04-30 15:27:12	4	1306.06	27.6495	85.3044	5	6	188	5.8		1.68819	5.15	5.8	900	929.5		926.8	927	943.3

## Sheet: Manual_raw
msmt_datetime (UTM)	msmt_datetime (LT)	geopoint:Accuracy	geopoint:Altitude	geopoint:Latitude	geopoint:Longitude	s4w_mm	cocorahs_mm	dhm_ml	dhm_mm
2017-05-01 10:32:00	2017-05-01 16:17:00	4.9	1333.9	27.6496	85.3043	9	9.7	310.4	9.6
2017-05-03 10:35:00	2017-05-03 16:20:00	4.6	1148.1	27.65	85.3049	0	0	0	0
2017-05-05 03:03:00	2017-05-05 08:48:00	5	1342.1	27.6495	85.3043	12	15.1	495	15.3
2017-05-07 02:21:00	2017-05-07 08:06:00	4.6	1347.1	27.6496	85.3044	8	9	290	8.9
2017-05-08 03:12:00	2017-05-08 08:57:00	4.4	1306.4	27.6495	85.3044	16	13.4	430	13.3
2017-05-09 14:52:00	2017-05-09 20:37:00	5	1345.4	27.6497	85.3044	4	4.4	141	4.3
2017-05-10 14:44:00	2017-05-10 20:29:00	5	1344.7	27.6496	85.3044	0	0	0	0
2017-05-12 11:24:00	2017-05-12 17:09:00	5	1352.9	27.6495	85.3045	2	2	72	2.2
2017-05-13 04:28:00	2017-05-13 10:13:00	5	1352.2	27.6495	85.3044	0	0	0	0
2017-05-15 04:52:00	2017-05-15 10:37:00	4.9	1356.1	27.6495	85.3043	0	0	0	0
2017-05-15 23:23:00	2017-05-16 05:08:00	5	1368.7	27.6494	85.3042	19	20.2	645	19.9
2017-05-17 10:53:00	2017-05-17 16:38:00	4.9	1329.6	27.6495	85.3045	4	4.6	150	4.6
2017-05-18 10:55:00	2017-05-18 16:40:00	5	1315.4	27.6494	85.3044	0	0	0	0
2017-05-22 07:39:00	2017-05-22 13:24:00	5	1332.9	27.6496	85.3043	2	3	100	3.1
2017-05-23 10:03:00	2017-05-23 15:48:00	4.5	1339.8	27.6496	85.3043	0	0	0	0
2017-06-03 12:12:00	2017-06-03 17:57:00	4.8	1344.1	27.6495	85.3043	40	41	1282.5	39.5
2017-06-06 12:43:00	2017-06-06 18:28:00	4.3	1338.8	27.6496	85.3044	8	8.2	275	8.5
2017-06-10 14:00:00	2017-06-10 19:45:00	4.5	1401.3	27.6495	85.3044	8	8.4	280	8.6
2017-06-13 11:24:00	2017-06-13 17:09:00	4.7	1353.8	27.6496	85.3044	0	0	0	0
2017-06-16 02:05:00	2017-06-16 07:50:00	4.6	1348.4	27.6495	85.3044	0	0	0	0
2017-06-20 04:03:00	2017-06-20 09:48:00	5	1336.7	27.6496	85.3044	0	0.3	15	0.5
2017-06-21 01:17:00	2017-06-21 07:02:00	4.7	1325	27.6496	85.3045	18	20.8	667	20.6
2017-06-23 01:05:00	2017-06-23 06:50:00	4.9	1350.5	27.6496	85.3044	3	3.2	100	3.1
2017-06-24 05:47:00	2017-06-24 11:32:00	4.9	1338.1	27.6497	85.3045	70	70.2	2320	71.5
2017-06-25 02:52:00	2017-06-25 08:37:00	4.8	1325.5	27.6495	85.3045	14	14.6	477	14.7
2017-06-26 02:11:00	2017-06-26 07:56:00	4.6	1365.1	27.6494	85.3045	42	41	1330	41
2017-06-27 01:36:00	2017-06-27 07:21:00	5	1340.2	27.6496	85.3046	0	0	0	0
2017-06-28 00:49:00	2017-06-28 06:34:00	4.7	1288.1	27.6495	85.3044	1	1.3	45	1.4
2017-06-29 02:39:00	2017-06-29 08:24:00	4.7	1345.7	27.6495	85.3045	1	1.4	47	1.4
2017-07-02 14:56:00	2017-07-02 20:41:00	4.9	1335.3	27.6496	85.3043	2	4.2	138	4.3
2017-07-03 01:49:00	2017-07-03 07:34:00	4.9	1270.8	27.6493	85.3044	0	0	0	0
2017-07-04 06:55:00	2017-07-04 12:40:00	4.8	1334.1	27.6496	85.3045	30	31	1010	31.1
2017-07-05 06:49:00	2017-07-05 12:34:00	4.3	1339.5	27.6496	85.3044	3	2.6	80	2.5
2017-07-06 05:24:00	2017-07-06 11:09:00	4.7	1344.2	27.6497	85.3045	15	15.6	510	15.7
2017-07-07 13:25:00	2017-07-07 19:10:00	4.5	1343.3	27.6496	85.3045	5	4.1	130	4
2017-07-10 12:31:00	2017-07-10 18:16:00	5	1386	27.6492	85.3046	24	25.2	840	25.9
2017-07-12 12:37:00	2017-07-12 18:22:00	4.8	1338.9	27.6496	85.3044	1	1.2	30	0.9
2017-07-16 12:53:00	2017-07-16 18:38:00	4.7	1337.2	27.6496	85.3044	15	16	515	15.9
2017-07-19 10:02:00	2017-07-19 15:47:00	4.8	1333.2	27.6495	85.3045	9	10.8	355	10.9
2017-07-21 13:23:00	2017-07-21 19:08:00	4.9	1237.2	27.6495	85.304	8	7.6	240	7.4
2017-07-22 11:05:00	2017-07-22 16:50:00	5	1353.3	27.6496	85.3045	17	17.3	537	16.6
2017-07-23 03:43:00	2017-07-23 09:28:00	5	1337.4	27.6496	85.3044	11	10.8	350	10.8
2017-07-24 01:34:00	2017-07-24 07:19:00	5	1333.1	27.6495	85.3045	16	15.6	502	15.5
2017-07-26 14:20:00	2017-07-26 20:05:00	5	1359.4	27.6495	85.3045	14	14.4	462	14.2
2017-07-28 13:38:00	2017-07-28 19:23:00	4.5	1355.6	27.6495	85.3044	0	0	0	0
2017-07-30 02:16:00	2017-07-30 08:01:00	4.8	1340.7	27.6495	85.3045	13	13.5	437	13.5
2017-07-31 02:14:00	2017-07-31 07:59:00	4.8	1330.2	27.6495	85.3045	0	0	0	0
2017-08-01 02:27:00	2017-08-01 08:12:00	4.9	1344.5	27.6495	85.3044	0	0	0	0
2017-08-02 02:39:00	2017-08-02 08:24:00	4.6	1336	27.6495	85.3044	9	9.8	315	9.7
2017-08-03 15:46:00	2017-08-03 21:31:00	4.9	1373.2	27.6494	85.3044	16	16.8	548	16.9
2017-08-06 02:42:00	2017-08-06 08:27:00	5	1325.7	27.6496	85.3044	10	10.6	340	10.5
2017-08-07 01:58:00	2017-08-07 07:43:00	4.9	1348.3	27.6495	85.3044	8	7.4	238	7.3
2017-08-08 02:35:00	2017-08-08 08:20:00	4.2	1340.2	27.6496	85.3045	0	0.4	11	0.3
2017-08-09 05:13:00	2017-08-09 10:58:00	4.9	1361.3	27.6496	85.3044	0	0	0	0
2017-08-10 05:08:00	2017-08-10 10:53:00	5	1358.5	27.6496	85.3044	0	0.8	25	0.8
2017-08-14 12:52:00	2017-08-14 18:37:00	5	1370.8	27.6495	85.3043	84	85.4	2265	86
2017-08-16 10:52:00	2017-08-16 16:37:00	4.9	1357.8	27.6496	85.3044	0	0	0	0
2017-08-17 11:56:00	2017-08-17 17:41:00	5	1364.7	27.6496	85.3045	11	10.2	315	9.7
2017-08-18 12:12:00	2017-08-18 17:57:00	4.5	1232.7	27.6499	85.3045	1	1	30	0.9
2017-08-19 06:16:00	2017-08-19 12:01:00	5	1135.5	27.6496	85.3041	27	27.3	884	27.3
2017-08-20 12:55:00	2017-08-20 18:40:00	4.6	1361	27.6495	85.3044	0	0.6	19	0.6
2017-08-22 15:54:00	2017-08-22 21:39:00	4.8	1345.1	27.6495	85.3045	4	4	125	3.9
2017-08-25 16:28:00	2017-08-25 22:13:00	4.5	1358.2	27.6496	85.3044	8	7.7	245	7.6
2017-08-27 04:06:00	2017-08-27 09:51:00	4.8	1368.2	27.6496	85.3045	2	1.6	50	1.5
2017-08-28 04:38:00	2017-08-28 10:23:00	4.9	1278.2	27.6497	85.3044	8	7.6	250	7.7
2017-08-29 00:48:00	2017-08-29 06:33:00	4.7	1332.1	27.6496	85.3044	0	0	0	0
2017-08-31 08:06:00	2017-08-31 13:51:00	5	1345.5	27.6496	85.3045	47	46.8	1520	46.9
2017-09-01 02:52:00	2017-09-01 08:37:00	4.8	1346.7	27.6496	85.3045	10	9.8	318	9.8
2017-09-04 01:49:00	2017-09-04 07:34:00	5	1339.5	27.6497	85.3044	6	5	161	5
2017-09-05 11:14:00	2017-09-05 16:59:00	5	1329.7	27.6496	85.3045	0	0.2	10	0.3
2017-09-06 01:22:00	2017-09-06 07:07:00	4.7	1315.4	27.6495	85.3044	0	0	0	0
2017-09-08 03:01:00	2017-09-08 08:46:00	4.6	1350.4	27.6496	85.3044	0	0	0	0
2017-09-11 02:57:00	2017-09-11 08:42:00	4.9	1341.4	27.6496	85.3044	0	0	0	0
2017-09-12 01:50:00	2017-09-12 07:35:00	4.7	1346.3	27.6496	85.3045	12	12.6	402	12.4
2017-09-18 08:13:00	2017-09-18 13:58:00	7.3	1343.8	27.6496	85.3045	32	33.2	1065	32.8
2017-09-20 12:18:00	2017-09-20 18:03:00	7.3	1356.3	27.6496	85.3044	5	4	127	3.9
2017-09-26 14:34:00	2017-09-26 20:19:00	7.3	1354.7	27.6496	85.3044	29	30	898	27.7
2017-10-17 17:24:12	2017-10-17 23:09:12	5	1320.4	27.6495	85.3044	0	1.6	60	1.9
2017-10-30 03:10:00	2017-10-30 08:55:00	4	1333.56	27.6496	85.3045	0	0	0	0
2017-11-15 05:15:00	2017-11-15 11:00:00	3	1304	27.6496	85.3044	0	0	0	0
2017-11-18 12:38:00	2017-11-18 18:23:00	5	1301	27.6496	85.3045	0	0	0	0
2018-01-30 11:06:00	2018-01-30 16:51:00	4	1325.31	27.6497	85.3045	5	5.7	184	5.7
2018-02-07 17:46:00	2018-02-07 23:31:00	8	1349.21	27.6497	85.3041	0	0	0	0
2018-02-27 10:12:00	2018-02-27 15:57:00	4	1298.56	27.6496	85.3045	0	1.2	45	1.4
2018-03-11 08:16:00	2018-03-11 14:01:00	10	1319.14	27.6496	85.3045	0	0.5	17	0.5
2018-03-12 04:45:00	2018-03-12 10:30:00	10	1341.09	27.6496	85.3044	25	25.6	867	26.7
2018-03-16 04:41:00	2018-03-16 10:26:00	10	1341.4	27.6496	85.3044	3	2.9	91	2.8
2018-03-30 02:15:00	2018-03-30 08:00:00	24.347	0	27.6495	85.3045	1	0.9	32	1
2018-04-03 06:09:00	2018-04-03 11:54:00	10	1294.7	27.6496	85.3044	3	3.4	105	3.2
2018-04-05 02:46:00	2018-04-05 08:31:00	10	1343.01	27.6495	85.3044	15	14.2	455	14
2018-04-09 01:42:00	2018-04-09 07:27:00	10	1294.86	27.6496	85.3044	2	1.9	55	1.7
2018-04-11 03:05:00	2018-04-11 08:50:00	4	1307.09	27.6495	85.3044	3	2.8	84	2.6
2018-04-13 04:41:00	2018-04-13 10:26:00	4	1331.47	27.6495	85.3044	0	1	30	0.9
2018-04-17 12:07:00	2018-04-17 17:52:00	4	1322.31	27.6496	85.3044	6	6.5	230	7.1
2018-04-21 04:48:00	2018-04-21 10:33:00	4	1309.62	27.6496	85.3045	4	4.5	140	4.3
2018-04-24 16:20:00	2018-04-24 22:05:00	4	1350.66	27.6495	85.3044	0	0	0	0
2018-04-28 17:11:12	2018-04-28 22:56:12	4	1311.83	27.6495	85.3044	35	36.3	1185	36.5
2018-04-30 09:42:12	2018-04-30 15:27:12	4	1306.06	27.6495	85.3044	5	6	188	5.8

## Sheet: Onset_raw
siteID	datetime	recNum	temp_c	onset_mm	shut_attach	log_stop	end_file
BP01PT	2017-06-03 15:45:00	1	28.456	0
BP01PT	2017-06-05 15:15:28	192		0.2
BP01PT	2017-06-05 15:16:47	193		0.4
BP01PT	2017-06-05 15:17:47	194		0.6
BP01PT	2017-06-05 15:18:59	195		0.8
BP01PT	2017-06-05 15:20:19	196		1
BP01PT	2017-06-05 15:21:59	197		1.2
BP01PT	2017-06-05 15:23:02	198		1.4
BP01PT	2017-06-05 15:23:50	199		1.6
BP01PT	2017-06-05 15:24:18	200		1.8
BP01PT	2017-06-05 15:24:19	201		2
BP01PT	2017-06-05 15:25:01	202		2.2
BP01PT	2017-06-05 15:25:02	203		2.4
BP01PT	2017-06-05 15:25:45	204		2.6
BP01PT	2017-06-05 15:26:34	205		2.8
BP01PT	2017-06-05 15:27:35	206		3
BP01PT	2017-06-05 15:29:09	207		3.2
BP01PT	2017-06-05 15:32:22	209		3.4
BP01PT	2017-06-05 15:35:34	210		3.6
BP01PT	2017-06-05 15:36:34	211		3.8
BP01PT	2017-06-05 15:37:44	212		4
BP01PT	2017-06-05 15:38:34	213		4.2
BP01PT	2017-06-05 15:39:27	214		4.4
BP01PT	2017-06-05 15:40:27	215		4.6
BP01PT	2017-06-05 15:41:28	216		4.8
BP01PT	2017-06-05 15:42:09	217		5
BP01PT	2017-06-05 15:42:48	218		5.2
BP01PT	2017-06-05 15:43:29	219		5.4
BP01PT	2017-06-05 15:44:08	220		5.6
BP01PT	2017-06-05 15:44:45	221		5.8
BP01PT	2017-06-05 15:45:41	223		6
BP01PT	2017-06-05 15:46:56	224		6.2
BP01PT	2017-06-05 15:48:57	225		6.4
BP01PT	2017-06-05 15:51:02	226		6.6
BP01PT	2017-06-05 15:52:25	227		6.8
BP01PT	2017-06-05 15:53:11	228		7
BP01PT	2017-06-05 15:53:12	229		7.2
BP01PT	2017-06-05 15:54:13	230		7.4
BP01PT	2017-06-05 15:55:35	231		7.6
BP01PT	2017-06-05 15:58:13	232		7.8
BP01PT	2017-06-05 16:02:11	234		8
BP01PT	2017-06-05 16:05:35	235		8.2
BP01PT	2017-06-05 16:11:30	236		8.4
BP01PT	2017-06-05 16:21:27	238		8.6
BP01PT	2017-06-05 16:42:08	240		8.8
BP01PT	2017-06-06 04:39:40	289		9
BP01PT	2017-06-09 16:05:20	624		9.2
BP01PT	2017-06-09 16:06:21	625		9.4
BP01PT	2017-06-09 16:06:49	626		9.6
BP01PT	2017-06-09 16:08:18	627		9.8
BP01PT	2017-06-09 16:17:58	629		10
BP01PT	2017-06-09 16:27:44	630		10.2
BP01PT	2017-06-09 16:29:13	631		10.4
BP01PT	2017-06-09 16:29:56	632		10.6
BP01PT	2017-06-09 16:30:24	634		10.8
BP01PT	2017-06-09 16:30:42	635		11
BP01PT	2017-06-09 16:30:58	636		11.2
BP01PT	2017-06-09 16:31:17	637		11.4
BP01PT	2017-06-09 16:31:41	638		11.6
BP01PT	2017-06-09 16:31:42	639		11.8
BP01PT	2017-06-09 16:32:13	640		12
BP01PT	2017-06-09 16:32:47	641		12.2
BP01PT	2017-06-09 16:33:46	642		12.4
BP01PT	2017-06-09 16:34:58	643		12.6
BP01PT	2017-06-09 16:36:07	644		12.8
BP01PT	2017-06-09 16:36:08	645		13
BP01PT	2017-06-09 16:37:06	646		13.2
BP01PT	2017-06-09 16:38:15	647		13.4
BP01PT	2017-06-09 16:39:48	648		13.6
BP01PT	2017-06-09 16:41:15	649		13.8
BP01PT	2017-06-09 16:43:29	650		14
BP01PT	2017-06-09 16:49:23	652		14.2
BP01PT	2017-06-09 16:52:06	653		14.4
BP01PT	2017-06-09 16:56:03	654		14.6
BP01PT	2017-06-09 16:58:32	655		14.8
BP01PT	2017-06-09 17:00:47	657		15
BP01PT	2017-06-09 17:02:08	658		15.2
BP01PT	2017-06-09 17:03:22	659		15.4
BP01PT	2017-06-09 17:05:40	660		15.6
BP01PT	2017-06-09 17:05:41	661		15.8
BP01PT	2017-06-09 17:08:04	662		16
BP01PT	2017-06-09 17:10:34	663		16.2
BP01PT	2017-06-09 17:16:35	665		16.4
BP01PT	2017-06-09 17:28:56	666		16.6
BP01PT	2017-06-09 17:36:00	668		16.8
BP01PT	2017-06-09 17:43:53	669		17
BP01PT	2017-06-09 17:53:36	671		17.2
BP01PT	2017-06-09 18:01:05	673		17.4
BP01PT	2017-06-09 18:21:26	675		17.6
BP01PT	2017-06-09 18:30:38	677		17.8
BP01PT	2017-06-10 12:35:39	750		18
BP01PT	2017-06-11 14:04:42	853		18.2
BP01PT	2017-06-16 14:06:26	1334		18.4
BP01PT	2017-06-16 14:08:59	1335		18.6
BP01PT	2017-06-16 14:44:51	1338		18.8
BP01PT	2017-06-20 10:46:14	1708		19
BP01PT	2017-06-20 10:50:03	1709		19.2
BP01PT	2017-06-20 10:56:12	1710		19.4
BP01PT	2017-06-20 10:58:06	1711		19.6
BP01PT	2017-06-20 10:59:32	1712		19.8
BP01PT	2017-06-20 10:59:33	1713		20
BP01PT	2017-06-20 11:00:40	1715		20.2
BP01PT	2017-06-20 11:02:06	1716		20.4
BP01PT	2017-06-20 11:04:07	1717		20.6
BP01PT	2017-06-20 11:04:08	1718		20.8
BP01PT	2017-06-20 11:05:46	1719		21
BP01PT	2017-06-20 11:08:57	1720		21.2
BP01PT	2017-06-20 11:20:50	1722		21.4
BP01PT	2017-06-20 11:29:13	1723		21.6
BP01PT	2017-06-20 11:35:25	1725		21.8
BP01PT	2017-06-20 12:36:07	1730		22
BP01PT	2017-06-20 15:12:04	1741		22.2
BP01PT	2017-06-20 15:14:01	1742		22.4
BP01PT	2017-06-20 15:14:02	1743		22.6
BP01PT	2017-06-20 15:16:27	1745		22.8
BP01PT	2017-06-20 15:17:59	1746		23
BP01PT	2017-06-20 15:19:12	1747		23.2
BP01PT	2017-06-20 15:20:56	1748		23.4
BP01PT	2017-06-20 15:21:38	1749		23.6
BP01PT	2017-06-20 15:22:47	1750		23.8
BP01PT	2017-06-20 15:27:40	1751		24
BP01PT	2017-06-21 02:00:15	1795		24.2
BP01PT	2017-06-21 02:08:35	1796		24.4
BP01PT	2017-06-21 02:10:48	1797		24.6
BP01PT	2017-06-21 02:13:44	1798		24.8
BP01PT	2017-06-21 02:17:49	1800		25
BP01PT	2017-06-21 02:21:50	1801		25.2
BP01PT	2017-06-21 02:25:27	1802		25.4
BP01PT	2017-06-21 02:29:37	1803		25.6
BP01PT	2017-06-21 02:38:33	1805		25.8
BP01PT	2017-06-21 02:45:17	1807		26
BP01PT	2017-06-21 02:50:37	1808		26.2
BP01PT	2017-06-21 02:55:07	1809		26.4
BP01PT	2017-06-21 02:59:05	1810		26.6
BP01PT	2017-06-21 03:01:40	1812		26.8
BP01PT	2017-06-21 03:04:04	1813		27
BP01PT	2017-06-21 03:06:56	1814		27.2
BP01PT	2017-06-21 03:09:42	1815		27.4
BP01PT	2017-06-21 03:12:10	1816		27.6
BP01PT	2017-06-21 03:14:09	1817		27.8
BP01PT	2017-06-21 03:16:57	1819		28
BP01PT	2017-06-21 03:19:35	1820		28.2
BP01PT	2017-06-21 03:21:26	1821		28.4
BP01PT	2017-06-21 03:22:53	1822		28.6
BP01PT	2017-06-21 03:24:36	1823		28.8
BP01PT	2017-06-21 03:26:20	1824		29
BP01PT	2017-06-21 03:28:17	1825		29.2
BP01PT	2017-06-21 03:30:11	1827		29.4
BP01PT	2017-06-21 03:30:12	1828		29.6
BP01PT	2017-06-21 03:31:35	1829		29.8
BP01PT	2017-06-21 03:33:10	1830		30
BP01PT	2017-06-21 03:34:39	1831		30.2
BP01PT	2017-06-21 03:35:54	1832		30.4
BP01PT	2017-06-21 03:37:16	1833		30.6
BP01PT	2017-06-21 03:38:34	1834		30.8
BP01PT	2017-06-21 03:39:43	1835		31
BP01PT	2017-06-21 03:41:09	1836		31.2
BP01PT	2017-06-21 03:42:25	1837		31.4
BP01PT	2017-06-21 03:43:47	1838		31.6
BP01PT	2017-06-21 03:45:06	1840		31.8
BP01PT	2017-06-21 03:46:48	1841		32
BP01PT	2017-06-21 03:48:28	1842		32.2
BP01PT	2017-06-21 03:50:11	1843		32.4
BP01PT	2017-06-21 03:51:58	1844		32.6
BP01PT	2017-06-21 03:53:40	1845		32.8
BP01PT	2017-06-21 03:55:19	1846		33
BP01PT	2017-06-21 03:55:20	1847		33.2
BP01PT	2017-06-21 03:56:58	1848		33.4
BP01PT	2017-06-21 03:58:29	1849		33.6
BP01PT	2017-06-21 04:00:14	1851		33.8
BP01PT	2017-06-21 04:02:09	1852		34
BP01PT	2017-06-21 04:04:05	1853		34.2
BP01PT	2017-06-21 04:05:47	1854		34.4
BP01PT	2017-06-21 04:07:40	1855		34.6
BP01PT	2017-06-21 04:09:24	1856		34.8
BP01PT	2017-06-21 04:11:08	1857		35
BP01PT	2017-06-21 04:12:50	1858		35.2
BP01PT	2017-06-21 04:14:42	1859		35.4
BP01PT	2017-06-21 04:16:45	1861		35.6
BP01PT	2017-06-21 04:19:00	1862		35.8
BP01PT	2017-06-21 04:21:07	1863		36
BP01PT	2017-06-21 04:23:14	1864		36.2
BP01PT	2017-06-21 04:25:29	1865		36.4
BP01PT	2017-06-21 04:25:30	1866		36.6
BP01PT	2017-06-21 04:28:19	1867		36.8
BP01PT	2017-06-21 04:30:49	1869		37
BP01PT	2017-06-21 04:33:27	1870		37.2
BP01PT	2017-06-21 04:36:37	1871		37.4
BP01PT	2017-06-21 04:40:17	1872		37.6
BP01PT	2017-06-21 04:43:42	1873		37.8
BP01PT	2017-06-21 04:47:23	1875		38
BP01PT	2017-06-21 04:52:01	1876		38.2
BP01PT	2017-06-21 04:56:45	1877		38.4
BP01PT	2017-06-21 05:03:25	1879		38.6
BP01PT	2017-06-21 05:12:26	1880		38.8
BP01PT	2017-06-21 05:39:07	1883		39
BP01PT	2017-06-21 05:48:32	1885		39.2
BP01PT	2017-06-21 05:59:21	1886		39.4
BP01PT	2017-06-21 06:18:57	1889		39.6
BP01PT	2017-06-21 06:22:37	1890		39.8
BP01PT	2017-06-21 06:22:38	1891		40
BP01PT	2017-06-21 06:28:16	1892		40.2
BP01PT	2017-06-21 06:38:19	1894		40.4
BP01PT	2017-06-21 06:58:26	1896		40.6
BP01PT	2017-06-21 09:00:34	1906		40.8
BP01PT	2017-06-22 14:06:25	2023		41
BP01PT	2017-06-22 14:06:50	2024		41.2
BP01PT	2017-06-22 14:07:07	2025		41.4
BP01PT	2017-06-22 14:07:21	2026		41.6
BP01PT	2017-06-22 14:07:22	2027		41.8
BP01PT	2017-06-22 14:07:31	2028		42
BP01PT	2017-06-22 14:07:32	2029		42.2
BP01PT	2017-06-22 14:07:42	2030		42.4
BP01PT	2017-06-22 14:07:57	2031		42.6
BP01PT	2017-06-22 14:07:58	2032		42.8
BP01PT	2017-06-22 14:08:12	2033		43
BP01PT	2017-06-22 14:08:13	2034		43.2
BP01PT	2017-06-22 14:08:30	2035		43.4
BP01PT	2017-06-22 14:09:13	2036		43.6
BP01PT	2017-06-22 14:16:22	2038		43.8
BP01PT	2017-06-22 14:17:49	2039		44
BP01PT	2017-06-22 14:22:06	2040		44.2
BP01PT	2017-06-22 14:22:07	2041		44.4
BP01PT	2017-06-23 07:32:36	2111		44.6
BP01PT	2017-06-24 02:25:11	2187		44.8
BP01PT	2017-06-24 02:26:19	2188		45
BP01PT	2017-06-24 02:26:20	2189		45.2
BP01PT	2017-06-24 02:26:38	2190		45.4
BP01PT	2017-06-24 02:26:53	2191		45.6
BP01PT	2017-06-24 02:27:07	2192		45.8
BP01PT	2017-06-24 02:27:17	2193		46
BP01PT	2017-06-24 02:27:27	2194		46.2
BP01PT	2017-06-24 02:27:37	2195		46.4
BP01PT	2017-06-24 02:27:46	2196		46.6
BP01PT	2017-06-24 02:27:55	2197		46.8
BP01PT	2017-06-24 02:28:02	2198		47
BP01PT	2017-06-24 02:28:10	2199		47.2
BP01PT	2017-06-24 02:28:19	2200		47.4
BP01PT	2017-06-24 02:28:29	2201		47.6
BP01PT	2017-06-24 02:28:39	2202		47.8
BP01PT	2017-06-24 02:28:47	2203		48
BP01PT	2017-06-24 02:28:54	2204		48.2
BP01PT	2017-06-24 02:28:55	2205		48.4
BP01PT	2017-06-24 02:29:03	2206		48.6
BP01PT	2017-06-24 02:29:13	2207		48.8
BP01PT	2017-06-24 02:29:26	2208		49
BP01PT	2017-06-24 02:29:38	2209		49.2
BP01PT	2017-06-24 02:29:49	2210		49.4
BP01PT	2017-06-24 02:29:50	2211		49.6
BP01PT	2017-06-24 02:30:01	2213		49.8
BP01PT	2017-06-24 02:30:13	2214		50
BP01PT	2017-06-24 02:30:23	2215		50.2
BP01PT	2017-06-24 02:30:33	2216		50.4
BP01PT	2017-06-24 02:30:45	2217		50.6
BP01PT	2017-06-24 02:30:57	2218		50.8
BP01PT	2017-06-24 02:31:09	2219		51
BP01PT	2017-06-24 02:31:24	2220		51.2
BP01PT	2017-06-24 02:31:40	2221		51.4
BP01PT	2017-06-24 02:31:56	2222		51.6
BP01PT	2017-06-24 02:32:13	2223		51.8
BP01PT	2017-06-24 02:32:28	2224		52
BP01PT	2017-06-24 02:32:45	2225		52.2
BP01PT	2017-06-24 02:32:46	2226		52.4
BP01PT	2017-06-24 02:33:04	2227		52.6
BP01PT	2017-06-24 02:33:05	2228		52.8
BP01PT	2017-06-24 02:33:25	2229		53
BP01PT	2017-06-24 02:33:49	2230		53.2
BP01PT	2017-06-24 02:34:10	2231		53.4
BP01PT	2017-06-24 02:34:34	2232		53.6
BP01PT	2017-06-24 02:34:35	2233		53.8
BP01PT	2017-06-24 02:35:03	2234		54
BP01PT	2017-06-24 02:35:04	2235		54.2
BP01PT	2017-06-24 02:35:34	2236		54.4
BP01PT	2017-06-24 02:36:12	2237		54.6
BP01PT	2017-06-24 02:36:41	2238		54.8
BP01PT	2017-06-24 02:36:42	2239		55
BP01PT	2017-06-24 02:37:11	2240		55.2
BP01PT	2017-06-24 02:37:31	2241		55.4
BP01PT	2017-06-24 02:37:48	2242		55.6
BP01PT	2017-06-24 02:37:49	2243		55.8
BP01PT	2017-06-24 02:38:07	2244		56
BP01PT	2017-06-24 02:38:25	2245		56.2
BP01PT	2017-06-24 02:38:42	2246		56.4
BP01PT	2017-06-24 02:39:02	2247		56.6
BP01PT	2017-06-24 02:39:24	2248		56.8
BP01PT	2017-06-24 02:39:44	2249		57
BP01PT	2017-06-24 02:40:11	2250		57.2
BP01PT	2017-06-24 02:40:41	2251		57.4
BP01PT	2017-06-24 02:41:21	2252		57.6
BP01PT	2017-06-24 02:41:59	2253		57.8
BP01PT	2017-06-24 02:42:39	2254		58
BP01PT	2017-06-24 02:43:15	2255		58.2
BP01PT	2017-06-24 02:43:50	2256		58.4
BP01PT	2017-06-24 02:44:24	2257		58.6
BP01PT	2017-06-24 02:44:59	2258		58.8
BP01PT	2017-06-24 02:45:00	2259	20.901	59
BP01PT	2017-06-24 02:45:41	2260		59.2
BP01PT	2017-06-24 02:46:23	2261		59.4
BP01PT	2017-06-24 02:46:51	2262		59.6
BP01PT	2017-06-24 02:47:10	2263		59.8
BP01PT	2017-06-24 02:47:38	2264		60
BP01PT	2017-06-24 02:48:04	2265		60.2
BP01PT	2017-06-24 02:48:25	2266		60.4
BP01PT	2017-06-24 02:48:39	2267		60.6
BP01PT	2017-06-24 02:48:51	2268		60.8
BP01PT	2017-06-24 02:49:06	2269		61
BP01PT	2017-06-24 02:49:24	2270		61.2
BP01PT	2017-06-24 02:49:40	2271		61.4
BP01PT	2017-06-24 02:49:56	2272		61.6
BP01PT	2017-06-24 02:50:11	2273		61.8
BP01PT	2017-06-24 02:50:24	2274		62
BP01PT	2017-06-24 02:50:34	2275		62.2
BP01PT	2017-06-24 02:50:46	2276		62.4
BP01PT	2017-06-24 02:51:00	2277		62.6
BP01PT	2017-06-24 02:51:01	2278		62.8
BP01PT	2017-06-24 02:51:34	2279		63
BP01PT	2017-06-24 02:51:53	2280		63.2
BP01PT	2017-06-24 02:52:00	2281		63.4
BP01PT	2017-06-24 02:52:01	2282		63.6
BP01PT	2017-06-24 02:52:08	2283		63.8
BP01PT	2017-06-24 02:52:09	2284		64
BP01PT	2017-06-24 02:52:18	2285		64.2
BP01PT	2017-06-24 02:52:28	2286		64.4
BP01PT	2017-06-24 02:52:37	2287		64.6
BP01PT	2017-06-24 02:52:47	2288		64.8
BP01PT	2017-06-24 02:52:55	2289		65
BP01PT	2017-06-24 02:53:04	2290		65.2
BP01PT	2017-06-24 02:53:12	2291		65.4
BP01PT	2017-06-24 02:53:13	2292		65.6
BP01PT	2017-06-24 02:53:22	2293		65.8
BP01PT	2017-06-24 02:53:29	2294		66
BP01PT	2017-06-24 02:53:36	2295		66.2
BP01PT	2017-06-24 02:53:43	2296		66.4
BP01PT	2017-06-24 02:53:51	2297		66.6
BP01PT	2017-06-24 02:53:58	2298		66.8
BP01PT	2017-06-24 02:53:59	2299		67
BP01PT	2017-06-24 02:54:06	2300		67.2
BP01PT	2017-06-24 02:54:07	2301		67.4
BP01PT	2017-06-24 02:54:13	2302		67.6
BP01PT	2017-06-24 02:54:20	2303		67.8
BP01PT	2017-06-24 02:54:28	2304		68
BP01PT	2017-06-24 02:54:37	2305		68.2
BP01PT	2017-06-24 02:54:46	2306		68.4
BP01PT	2017-06-24 02:54:57	2307		68.6
BP01PT	2017-06-24 02:55:06	2308		68.8
BP01PT	2017-06-24 02:55:15	2309		69
BP01PT	2017-06-24 02:55:23	2310		69.2
BP01PT	2017-06-24 02:55:30	2311		69.4
BP01PT	2017-06-24 02:55:36	2312		69.6
BP01PT	2017-06-24 02:55:43	2313		69.8
BP01PT	2017-06-24 02:55:49	2314		70
BP01PT	2017-06-24 02:55:55	2315		70.2
BP01PT	2017-06-24 02:56:02	2316		70.4
BP01PT	2017-06-24 02:56:08	2317		70.6
BP01PT	2017-06-24 02:56:15	2318		70.8
BP01PT	2017-06-24 02:56:22	2319		71
BP01PT	2017-06-24 02:56:30	2320		71.2
BP01PT	2017-06-24 02:56:37	2321		71.4
BP01PT	2017-06-24 02:56:44	2322		71.6
BP01PT	2017-06-24 02:56:52	2323		71.8
BP01PT	2017-06-24 02:56:58	2324		72
BP01PT	2017-06-24 02:57:05	2325		72.2
BP01PT	2017-06-24 02:57:11	2326		72.4
BP01PT	2017-06-24 02:57:18	2327		72.6
BP01PT	2017-06-24 02:57:19	2328		72.8
BP01PT	2017-06-24 02:57:25	2329		73
BP01PT	2017-06-24 02:57:33	2330		73.2
BP01PT	2017-06-24 02:57:40	2331		73.4
BP01PT	2017-06-24 02:57:48	2332		73.6
BP01PT	2017-06-24 02:57:57	2333		73.8
BP01PT	2017-06-24 02:58:05	2334		74
BP01PT	2017-06-24 02:58:13	2335		74.2
BP01PT	2017-06-24 02:58:20	2336		74.4
BP01PT	2017-06-24 02:58:21	2337		74.6
BP01PT	2017-06-24 02:58:30	2338		74.8
BP01PT	2017-06-24 02:58:39	2339		75
BP01PT	2017-06-24 02:58:40	2340		75.2
BP01PT	2017-06-24 02:58:50	2341		75.4
BP01PT	2017-06-24 02:59:01	2342		75.6
BP01PT	2017-06-24 02:59:12	2343		75.8
BP01PT	2017-06-24 02:59:24	2344		76
BP01PT	2017-06-24 02:59:34	2345		76.2
BP01PT	2017-06-24 02:59:46	2346		76.4
BP01PT	2017-06-24 02:59:47	2347		76.6
BP01PT	2017-06-24 02:59:59	2348		76.8
BP01PT	2017-06-24 03:00:14	2350		77
BP01PT	2017-06-24 03:00:28	2351		77.2
BP01PT	2017-06-24 03:00:45	2352		77.4
BP01PT	2017-06-24 03:00:56	2353		77.6
BP01PT	2017-06-24 03:00:57	2354		77.8
BP01PT	2017-06-24 03:01:08	2355		78
BP01PT	2017-06-24 03:01:18	2356		78.2
BP01PT	2017-06-24 03:01:19	2357		78.4
BP01PT	2017-06-24 03:01:30	2358		78.6
BP01PT	2017-06-24 03:01:43	2359		78.8
BP01PT	2017-06-24 03:01:56	2360		79
BP01PT	2017-06-24 03:02:07	2361		79.2
BP01PT	2017-06-24 03:02:19	2362		79.4
BP01PT	2017-06-24 03:02:30	2363		79.6
BP01PT	2017-06-24 03:02:42	2364		79.8
BP01PT	2017-06-24 03:02:53	2365		80
BP01PT	2017-06-24 03:03:06	2366		80.2
BP01PT	2017-06-24 03:03:17	2367		80.4
BP01PT	2017-06-24 03:03:29	2368		80.6
BP01PT	2017-06-24 03:03:39	2369		80.8
BP01PT	2017-06-24 03:03:52	2370		81
BP01PT	2017-06-24 03:04:05	2371		81.2
BP01PT	2017-06-24 03:04:19	2372		81.4
BP01PT	2017-06-24 03:04:32	2373		81.6
BP01PT	2017-06-24 03:04:44	2374		81.8
BP01PT	2017-06-24 03:04:55	2375		82
BP01PT	2017-06-24 03:05:07	2376		82.2
BP01PT	2017-06-24 03:05:16	2377		82.4
BP01PT	2017-06-24 03:05:17	2378		82.6
BP01PT	2017-06-24 03:05:28	2379		82.8
BP01PT	2017-06-24 03:05:39	2380		83
BP01PT	2017-06-24 03:05:50	2381		83.2
BP01PT	2017-06-24 03:06:01	2382		83.4
BP01PT	2017-06-24 03:06:11	2383		83.6
BP01PT	2017-06-24 03:06:12	2384		83.8
BP01PT	2017-06-24 03:06:24	2385		84
BP01PT	2017-06-24 03:06:37	2386		84.2
BP01PT	2017-06-24 03:06:49	2387		84.4
BP01PT	2017-06-24 03:07:04	2388		84.6
BP01PT	2017-06-24 03:07:16	2389		84.8
BP01PT	2017-06-24 03:07:28	2390		85
BP01PT	2017-06-24 03:07:38	2391		85.2
BP01PT	2017-06-24 03:07:50	2392		85.4
BP01PT	2017-06-24 03:07:59	2393		85.6
BP01PT	2017-06-24 03:08:09	2394		85.8
BP01PT	2017-06-24 03:08:19	2395		86
BP01PT	2017-06-24 03:08:28	2396		86.2
BP01PT	2017-06-24 03:08:36	2397		86.4
BP01PT	2017-06-24 03:08:37	2398		86.6
BP01PT	2017-06-24 03:08:46	2399		86.8
BP01PT	2017-06-24 03:08:55	2400		87
BP01PT	2017-06-24 03:09:05	2401		87.2
BP01PT	2017-06-24 03:09:14	2402		87.4
BP01PT	2017-06-24 03:09:24	2403		87.6
BP01PT	2017-06-24 03:09:34	2404		87.8
BP01PT	2017-06-24 03:09:35	2405		88
BP01PT	2017-06-24 03:09:45	2406		88.2
BP01PT	2017-06-24 03:09:56	2407		88.4
BP01PT	2017-06-24 03:10:08	2408		88.6
BP01PT	2017-06-24 03:10:18	2409		88.8
BP01PT	2017-06-24 03:10:31	2410		89
BP01PT	2017-06-24 03:10:43	2411		89.2
BP01PT	2017-06-24 03:10:44	2412		89.4
BP01PT	2017-06-24 03:10:54	2413		89.6
BP01PT	2017-06-24 03:11:01	2414		89.8
BP01PT	2017-06-24 03:11:02	2415		90
BP01PT	2017-06-24 03:11:11	2416		90.2
BP01PT	2017-06-24 03:11:12	2417		90.4
BP01PT	2017-06-24 03:11:21	2418		90.6
BP01PT	2017-06-24 03:11:29	2419		90.8
BP01PT	2017-06-24 03:11:30	2420		91
BP01PT	2017-06-24 03:11:38	2421		91.2
BP01PT	2017-06-24 03:11:48	2422		91.4
BP01PT	2017-06-24 03:11:56	2423		91.6
BP01PT	2017-06-24 03:12:07	2424		91.8
BP01PT	2017-06-24 03:12:16	2425		92
BP01PT	2017-06-24 03:12:25	2426		92.2
BP01PT	2017-06-24 03:12:33	2427		92.4
BP01PT	2017-06-24 03:12:42	2428		92.6
BP01PT	2017-06-24 03:12:52	2429		92.8
BP01PT	2017-06-24 03:13:02	2430		93
BP01PT	2017-06-24 03:13:12	2431		93.2
BP01PT	2017-06-24 03:13:24	2432		93.4
BP01PT	2017-06-24 03:13:33	2433		93.6
BP01PT	2017-06-24 03:13:44	2434		93.8
BP01PT	2017-06-24 03:13:54	2435		94
BP01PT	2017-06-24 03:14:05	2436		94.2
BP01PT	2017-06-24 03:14:16	2437		94.4
BP01PT	2017-06-24 03:14:27	2438		94.6
BP01PT	2017-06-24 03:14:39	2439		94.8
BP01PT	2017-06-24 03:14:56	2440		95
BP01PT	2017-06-24 03:15:14	2442		95.2
BP01PT	2017-06-24 03:15:37	2443		95.4
BP01PT	2017-06-24 03:16:05	2444		95.6
BP01PT	2017-06-24 03:16:43	2445		95.8
BP01PT	2017-06-24 03:17:32	2446		96
BP01PT	2017-06-24 03:18:30	2447		96.2
BP01PT	2017-06-24 03:19:32	2448		96.4
BP01PT	2017-06-24 03:20:43	2449		96.6
BP01PT	2017-06-24 03:21:25	2450		96.8
BP01PT	2017-06-24 03:21:26	2451		97
BP01PT	2017-06-24 03:22:10	2452		97.2
BP01PT	2017-06-24 03:22:39	2453		97.4
BP01PT	2017-06-24 03:23:03	2454		97.6
BP01PT	2017-06-24 03:23:20	2455		97.8
BP01PT	2017-06-24 03:23:37	2456		98
BP01PT	2017-06-24 03:23:54	2457		98.2
BP01PT	2017-06-24 03:24:09	2458		98.4
BP01PT	2017-06-24 03:24:23	2459		98.6
BP01PT	2017-06-24 03:24:35	2460		98.8
BP01PT	2017-06-24 03:24:46	2461		99
BP01PT	2017-06-24 03:24:55	2462		99.2
BP01PT	2017-06-24 03:25:04	2463		99.4
BP01PT	2017-06-24 03:25:15	2464		99.6
BP01PT	2017-06-24 03:25:25	2465		99.8
BP01PT	2017-06-24 03:25:37	2466		100
BP01PT	2017-06-24 03:25:47	2467		100.2
BP01PT	2017-06-24 03:25:48	2468		100.4
BP01PT	2017-06-24 03:25:58	2469		100.6
BP01PT	2017-06-24 03:25:59	2470		100.8
BP01PT	2017-06-24 03:26:10	2471		101
BP01PT	2017-06-24 03:26:22	2472		101.2
BP01PT	2017-06-24 03:26:35	2473		101.4
BP01PT	2017-06-24 03:26:50	2474		101.6
BP01PT	2017-06-24 03:27:02	2475		101.8
BP01PT	2017-06-24 03:27:15	2476		102
BP01PT	2017-06-24 03:27:16	2477		102.2
BP01PT	2017-06-24 03:27:28	2478		102.4
BP01PT	2017-06-24 03:27:42	2479		102.6
BP01PT	2017-06-24 03:27:54	2480		102.8
BP01PT	2017-06-24 03:28:11	2481		103
BP01PT	2017-06-24 03:28:26	2482		103.2
BP01PT	2017-06-24 03:28:45	2483		103.4
BP01PT	2017-06-24 03:29:04	2484		103.6
BP01PT	2017-06-24 03:29:20	2485		103.8
BP01PT	2017-06-24 03:29:33	2486		104
BP01PT	2017-06-24 03:29:49	2487		104.2
BP01PT	2017-06-24 03:30:03	2489		104.4
BP01PT	2017-06-24 03:30:19	2490		104.6
BP01PT	2017-06-24 03:30:20	2491		104.8
BP01PT	2017-06-24 03:30:33	2492		105
BP01PT	2017-06-24 03:30:45	2493		105.2
BP01PT	2017-06-24 03:30:55	2494		105.4
BP01PT	2017-06-24 03:31:06	2495		105.6
BP01PT	2017-06-24 03:31:16	2496		105.8
BP01PT	2017-06-24 03:31:27	2497		106
BP01PT	2017-06-24 03:31:38	2498		106.2
BP01PT	2017-06-24 03:31:51	2499		106.4
BP01PT	2017-06-24 03:32:04	2500		106.6
BP01PT	2017-06-24 03:32:18	2501		106.8
BP01PT	2017-06-24 03:32:30	2502		107
BP01PT	2017-06-24 03:32:42	2503		107.2
BP01PT	2017-06-24 03:32:43	2504		107.4
BP01PT	2017-06-24 03:32:56	2505		107.6
BP01PT	2017-06-24 03:33:10	2506		107.8
BP01PT	2017-06-24 03:33:21	2507		108
BP01PT	2017-06-24 03:33:33	2508		108.2
BP01PT	2017-06-24 03:33:44	2509		108.4
BP01PT	2017-06-24 03:33:55	2510		108.6
BP01PT	2017-06-24 03:33:56	2511		108.8
BP01PT	2017-06-24 03:34:05	2512		109
BP01PT	2017-06-24 03:34:06	2513		109.2
BP01PT	2017-06-24 03:34:18	2514		109.4
BP01PT	2017-06-24 03:34:29	2515		109.6
BP01PT	2017-06-24 03:34:30	2516		109.8
BP01PT	2017-06-24 03:34:41	2517		110
BP01PT	2017-06-24 03:34:53	2518		110.2
BP01PT	2017-06-24 03:35:07	2519		110.4
BP01PT	2017-06-24 03:35:20	2520		110.6
BP01PT	2017-06-24 03:35:32	2521		110.8
BP01PT	2017-06-24 03:35:45	2522		111
BP01PT	2017-06-24 03:35:57	2523		111.2
BP01PT	2017-06-24 03:36:09	2524		111.4
BP01PT	2017-06-24 03:36:24	2525		111.6
BP01PT	2017-06-24 03:36:38	2526		111.8
BP01PT	2017-06-24 03:36:53	2527		112
BP01PT	2017-06-24 03:37:07	2528		112.2
BP01PT	2017-06-24 03:37:23	2529		112.4
BP01PT	2017-06-24 03:37:40	2530		112.6
BP01PT	2017-06-24 03:38:02	2531		112.8
BP01PT	2017-06-24 03:38:20	2532		113
BP01PT	2017-06-24 03:38:42	2533		113.2
BP01PT	2017-06-24 03:38:59	2534		113.4
BP01PT	2017-06-24 03:39:20	2535		113.6
BP01PT	2017-06-24 03:39:41	2536		113.8
BP01PT	2017-06-24 03:40:09	2537		114
BP01PT	2017-06-24 03:40:37	2538		114.2
BP01PT	2017-06-24 03:41:09	2539		114.4
BP01PT	2017-06-24 03:41:43	2540		114.6
BP01PT	2017-06-24 03:42:12	2541		114.8
BP01PT	2017-06-24 03:42:40	2542		115
BP01PT	2017-06-24 03:43:12	2543		115.2
BP01PT	2017-06-24 03:43:38	2544		115.4
BP01PT	2017-06-24 03:44:02	2545		115.6
BP01PT	2017-06-24 03:44:26	2546		115.8
BP01PT	2017-06-24 03:44:54	2547		116
BP01PT	2017-06-24 03:45:23	2549		116.2
BP01PT	2017-06-24 03:46:02	2550		116.4
BP01PT	2017-06-24 03:46:40	2551		116.6
BP01PT	2017-06-24 03:46:41	2552		116.8
BP01PT	2017-06-24 03:47:29	2553		117
BP01PT	2017-06-24 03:48:08	2554		117.2
BP01PT	2017-06-24 03:48:09	2555		117.4
BP01PT	2017-06-24 03:48:55	2556		117.6
BP01PT	2017-06-24 03:49:36	2557		117.8
BP01PT	2017-06-24 03:50:19	2558		118
BP01PT	2017-06-24 03:50:56	2559		118.2
BP01PT	2017-06-24 03:51:22	2560		118.4
BP01PT	2017-06-24 03:51:52	2561		118.6
BP01PT	2017-06-24 03:52:24	2562		118.8
BP01PT	2017-06-24 03:52:52	2563		119
BP01PT	2017-06-24 03:53:29	2564		119.2
BP01PT	2017-06-24 03:54:14	2565		119.4
BP01PT	2017-06-24 03:55:50	2566		119.6
BP01PT	2017-06-24 03:57:37	2567		119.8
BP01PT	2017-06-24 04:00:46	2569		120
BP01PT	2017-06-24 04:03:33	2570		120.2
BP01PT	2017-06-24 04:05:24	2571		120.4
BP01PT	2017-06-24 04:05:25	2572		120.6
BP01PT	2017-06-24 04:06:33	2573		120.8
BP01PT	2017-06-24 04:07:22	2574		121
BP01PT	2017-06-24 04:08:09	2575		121.2
BP01PT	2017-06-24 04:11:31	2576		121.4
BP01PT	2017-06-24 04:21:45	2578		121.6
BP01PT	2017-06-24 04:27:47	2579		121.8
BP01PT	2017-06-24 04:30:45	2581		122
BP01PT	2017-06-24 04:34:26	2582		122.2
BP01PT	2017-06-24 04:38:59	2583		122.4
BP01PT	2017-06-24 04:45:43	2585		122.6
BP01PT	2017-06-24 04:50:50	2586		122.8
BP01PT	2017-06-24 04:50:51	2587		123
BP01PT	2017-06-24 04:56:28	2588		123.2
BP01PT	2017-06-24 04:59:35	2589		123.4
BP01PT	2017-06-24 05:03:23	2591		123.6
BP01PT	2017-06-24 05:07:36	2592		123.8
BP01PT	2017-06-24 05:13:04	2593		124
BP01PT	2017-06-24 05:19:46	2595		124.2
BP01PT	2017-06-24 05:25:45	2596		124.4
BP01PT	2017-06-24 05:46:29	2599		124.6
BP01PT	2017-06-25 00:02:49	2673		124.8
BP01PT	2017-06-25 00:16:43	2675		125
BP01PT	2017-06-25 00:19:05	2676		125.2
BP01PT	2017-06-25 00:22:06	2677		125.4
BP01PT	2017-06-25 00:24:22	2678		125.6
BP01PT	2017-06-25 00:28:15	2679		125.8
BP01PT	2017-06-25 00:28:16	2680		126
BP01PT	2017-06-25 00:34:01	2682		126.2
BP01PT	2017-06-25 00:39:42	2683		126.4
BP01PT	2017-06-25 00:43:52	2684		126.6
BP01PT	2017-06-25 00:49:09	2686		126.8
BP01PT	2017-06-25 00:49:10	2687		127
BP01PT	2017-06-25 00:54:17	2688		127.2
BP01PT	2017-06-25 00:57:12	2689		127.4
BP01PT	2017-06-25 01:00:43	2691		127.6
BP01PT	2017-06-25 01:02:12	2692		127.8
BP01PT	2017-06-25 01:03:59	2693		128
BP01PT	2017-06-25 01:06:15	2694		128.2
BP01PT	2017-06-25 01:08:00	2695		128.4
BP01PT	2017-06-25 01:09:26	2696		128.6
BP01PT	2017-06-25 01:11:29	2697		128.8
BP01PT	2017-06-25 01:15:42	2699		129
BP01PT	2017-06-25 01:36:30	2701		129.2
BP01PT	2017-06-25 01:41:03	2702		129.4
BP01PT	2017-06-25 01:43:37	2703		129.6
BP01PT	2017-06-25 01:44:43	2704		129.8
BP01PT	2017-06-25 01:45:37	2706		130
BP01PT	2017-06-25 01:46:33	2707		130.2
BP01PT	2017-06-25 01:46:34	2708		130.4
BP01PT	2017-06-25 01:47:28	2709		130.6
BP01PT	2017-06-25 01:48:35	2710		130.8
BP01PT	2017-06-25 01:50:08	2711		131
BP01PT	2017-06-25 01:51:43	2712		131.2
BP01PT	2017-06-25 01:53:09	2713		131.4
BP01PT	2017-06-25 01:54:44	2714		131.6
BP01PT	2017-06-25 01:54:45	2715		131.8
BP01PT	2017-06-25 01:57:13	2716		132
BP01PT	2017-06-25 01:59:44	2717		132.2
BP01PT	2017-06-25 02:02:37	2719		132.4
BP01PT	2017-06-25 02:06:11	2720		132.6
BP01PT	2017-06-25 02:06:12	2721		132.8
BP01PT	2017-06-25 02:08:19	2722		133
BP01PT	2017-06-25 02:12:51	2723		133.2
BP01PT	2017-06-25 02:15:01	2725		133.4
BP01PT	2017-06-25 02:16:03	2726		133.6
BP01PT	2017-06-25 02:17:05	2727		133.8
BP01PT	2017-06-25 02:17:06	2728		134
BP01PT	2017-06-25 02:18:20	2729		134.2
BP01PT	2017-06-25 02:20:34	2730		134.4
BP01PT	2017-06-25 02:22:09	2731		134.6
BP01PT	2017-06-25 02:23:04	2732		134.8
BP01PT	2017-06-25 02:24:06	2733		135
BP01PT	2017-06-25 02:24:07	2734		135.2
BP01PT	2017-06-25 02:25:06	2735		135.4
BP01PT	2017-06-25 02:26:20	2736		135.6
BP01PT	2017-06-25 02:27:43	2737		135.8
BP01PT	2017-06-25 02:29:37	2738		136
BP01PT	2017-06-25 02:32:04	2740		136.2
BP01PT	2017-06-25 02:34:16	2741		136.4
BP01PT	2017-06-25 02:35:33	2742		136.6
BP01PT	2017-06-25 02:36:45	2743		136.8
BP01PT	2017-06-25 02:37:53	2744		137
BP01PT	2017-06-25 02:39:19	2745		137.2
BP01PT	2017-06-25 02:40:51	2746		137.4
BP01PT	2017-06-25 02:40:52	2747		137.6
BP01PT	2017-06-25 02:41:54	2748		137.8
BP01PT	2017-06-25 02:43:26	2749		138
BP01PT	2017-06-25 02:45:29	2751		138.2
BP01PT	2017-06-25 02:48:37	2752		138.4
BP01PT	2017-06-25 02:48:38	2753		138.6
BP01PT	2017-06-25 02:54:40	2754		138.8
BP01PT	2017-06-25 03:12:36	2756		139
BP01PT	2017-06-25 03:23:20	2758		139.2
BP01PT	2017-06-25 03:31:23	2760		139.4
BP01PT	2017-06-25 03:37:04	2761		139.6
BP01PT	2017-06-25 03:41:20	2762		139.8
BP01PT	2017-06-25 03:45:59	2764		140
BP01PT	2017-06-25 03:46:00	2765		140.2
BP01PT	2017-06-25 03:49:48	2766		140.4
BP01PT	2017-06-25 03:55:53	2767		140.6
BP01PT	2017-06-25 04:07:06	2769		140.8
BP01PT	2017-06-25 04:51:34	2773		141
BP01PT	2017-06-26 03:59:16	2866		141.2
BP01PT	2017-06-26 04:03:09	2868		141.4
BP01PT	2017-06-26 04:05:21	2869		141.6
BP01PT	2017-06-26 04:06:24	2870		141.8
BP01PT	2017-06-26 04:06:40	2871		142
BP01PT	2017-06-26 04:06:52	2872		142.2
BP01PT	2017-06-26 04:06:53	2873		142.4
BP01PT	2017-06-26 04:07:03	2874		142.6
BP01PT	2017-06-26 04:07:04	2875		142.8
BP01PT	2017-06-26 04:07:18	2876		143
BP01PT	2017-06-26 04:07:31	2877		143.2
BP01PT	2017-06-26 04:07:43	2878		143.4
BP01PT	2017-06-26 04:07:44	2879		143.6
BP01PT	2017-06-26 04:07:55	2880		143.8
BP01PT	2017-06-26 04:07:56	2881		144
BP01PT	2017-06-26 04:08:06	2882		144.2
BP01PT	2017-06-26 04:08:15	2883		144.4
BP01PT	2017-06-26 04:08:27	2884		144.6
BP01PT	2017-06-26 04:08:39	2885		144.8
BP01PT	2017-06-26 04:08:49	2886		145
BP01PT	2017-06-26 04:08:59	2887		145.2
BP01PT	2017-06-26 04:09:11	2888		145.4
BP01PT	2017-06-26 04:09:20	2889		145.6
BP01PT	2017-06-26 04:09:30	2890		145.8
BP01PT	2017-06-26 04:09:31	2891		146
BP01PT	2017-06-26 04:09:40	2892		146.2
BP01PT	2017-06-26 04:09:50	2893		146.4
BP01PT	2017-06-26 04:10:00	2894		146.6
BP01PT	2017-06-26 04:10:11	2895		146.8
BP01PT	2017-06-26 04:10:21	2896		147
BP01PT	2017-06-26 04:10:32	2897		147.2
BP01PT	2017-06-26 04:10:33	2898		147.4
BP01PT	2017-06-26 04:10:44	2899		147.6
BP01PT	2017-06-26 04:10:56	2900		147.8
BP01PT	2017-06-26 04:11:04	2901		148
BP01PT	2017-06-26 04:11:05	2902		148.2
BP01PT	2017-06-26 04:11:13	2903		148.4
BP01PT	2017-06-26 04:11:22	2904		148.6
BP01PT	2017-06-26 04:11:32	2905		148.8
BP01PT	2017-06-26 04:11:41	2906		149
BP01PT	2017-06-26 04:11:50	2907		149.2
BP01PT	2017-06-26 04:11:59	2908		149.4
BP01PT	2017-06-26 04:12:09	2909		149.6
BP01PT	2017-06-26 04:12:18	2910		149.8
BP01PT	2017-06-26 04:12:29	2911		150
BP01PT	2017-06-26 04:12:39	2912		150.2
BP01PT	2017-06-26 04:12:49	2913		150.4
BP01PT	2017-06-26 04:12:58	2914		150.6
BP01PT	2017-06-26 04:13:09	2915		150.8
BP01PT	2017-06-26 04:13:20	2916		151
BP01PT	2017-06-26 04:13:32	2917		151.2
BP01PT	2017-06-26 04:13:48	2918		151.4
BP01PT	2017-06-26 04:14:04	2919		151.6
BP01PT	2017-06-26 04:14:22	2920		151.8
BP01PT	2017-06-26 04:14:40	2921		152
BP01PT	2017-06-26 04:14:57	2922		152.2
BP01PT	2017-06-26 04:15:18	2924		152.4
BP01PT	2017-06-26 04:15:34	2925		152.6
BP01PT	2017-06-26 04:15:35	2926		152.8
BP01PT	2017-06-26 04:15:50	2927		153
BP01PT	2017-06-26 04:16:03	2928		153.2
BP01PT	2017-06-26 04:16:04	2929		153.4
BP01PT	2017-06-26 04:16:19	2930		153.6
BP01PT	2017-06-26 04:16:33	2931		153.8
BP01PT	2017-06-26 04:16:44	2932		154
BP01PT	2017-06-26 04:16:57	2933		154.2
BP01PT	2017-06-26 04:17:11	2934		154.4
BP01PT	2017-06-26 04:17:23	2935		154.6
BP01PT	2017-06-26 04:17:37	2936		154.8
BP01PT	2017-06-26 04:17:51	2937		155
BP01PT	2017-06-26 04:18:05	2938		155.2
BP01PT	2017-06-26 04:18:17	2939		155.4
BP01PT	2017-06-26 04:18:28	2940		155.6
BP01PT	2017-06-26 04:18:39	2941		155.8
BP01PT	2017-06-26 04:18:52	2942		156
BP01PT	2017-06-26 04:19:03	2943		156.2
BP01PT	2017-06-26 04:19:16	2944		156.4
BP01PT	2017-06-26 04:19:27	2945		156.6
BP01PT	2017-06-26 04:19:37	2946		156.8
BP01PT	2017-06-26 04:19:47	2947		157
BP01PT	2017-06-26 04:19:56	2948		157.2
BP01PT	2017-06-26 04:20:08	2949		157.4
BP01PT	2017-06-26 04:20:23	2950		157.6
BP01PT	2017-06-26 04:20:37	2951		157.8
BP01PT	2017-06-26 04:20:54	2952		158
BP01PT	2017-06-26 04:21:09	2953		158.2
BP01PT	2017-06-26 04:21:22	2954		158.4
BP01PT	2017-06-26 04:21:37	2955		158.6
BP01PT	2017-06-26 04:21:55	2956		158.8
BP01PT	2017-06-26 04:22:12	2957		159
BP01PT	2017-06-26 04:22:28	2958		159.2
BP01PT	2017-06-26 04:22:45	2959		159.4
BP01PT	2017-06-26 04:23:06	2960		159.6
BP01PT	2017-06-26 04:23:25	2961		159.8
BP01PT	2017-06-26 04:23:26	2962		160
BP01PT	2017-06-26 04:23:46	2963		160.2
BP01PT	2017-06-26 04:24:05	2964		160.4
BP01PT	2017-06-26 04:24:22	2965		160.6
BP01PT	2017-06-26 04:24:40	2966		160.8
BP01PT	2017-06-26 04:24:55	2967		161
BP01PT	2017-06-26 04:25:12	2968		161.2
BP01PT	2017-06-26 04:25:29	2969		161.4
BP01PT	2017-06-26 04:25:47	2970		161.6
BP01PT	2017-06-26 04:26:06	2971		161.8
BP01PT	2017-06-26 04:26:25	2972		162
BP01PT	2017-06-26 04:26:46	2973		162.2
BP01PT	2017-06-26 04:27:06	2974		162.4
BP01PT	2017-06-26 04:27:25	2975		162.6
BP01PT	2017-06-26 04:27:26	2976		162.8
BP01PT	2017-06-26 04:27:43	2977		163
BP01PT	2017-06-26 04:27:58	2978		163.2
BP01PT	2017-06-26 04:27:59	2979		163.4
BP01PT	2017-06-26 04:28:12	2980		163.6
BP01PT	2017-06-26 04:28:13	2981		163.8
BP01PT	2017-06-26 04:28:27	2982		164
BP01PT	2017-06-26 04:28:42	2983		164.2
BP01PT	2017-06-26 04:28:58	2984		164.4
BP01PT	2017-06-26 04:29:13	2985		164.6
BP01PT	2017-06-26 04:29:26	2986		164.8
BP01PT	2017-06-26 04:29:40	2987		165
BP01PT	2017-06-26 04:29:53	2988		165.2
BP01PT	2017-06-26 04:30:07	2990		165.4
BP01PT	2017-06-26 04:30:22	2991		165.6
BP01PT	2017-06-26 04:30:35	2992		165.8
BP01PT	2017-06-26 04:30:36	2993		166
BP01PT	2017-06-26 04:30:52	2994		166.2
BP01PT	2017-06-26 04:30:53	2995		166.4
BP01PT	2017-06-26 04:31:07	2996		166.6
BP01PT	2017-06-26 04:31:20	2997		166.8
BP01PT	2017-06-26 04:31:33	2998		167
BP01PT	2017-06-26 04:31:46	2999		167.2
BP01PT	2017-06-26 04:31:59	3000		167.4
BP01PT	2017-06-26 04:32:13	3001		167.6
BP01PT	2017-06-26 04:32:25	3002		167.8
BP01PT	2017-06-26 04:32:36	3003		168
BP01PT	2017-06-26 04:32:37	3004		168.2
BP01PT	2017-06-26 04:32:49	3005		168.4
BP01PT	2017-06-26 04:33:03	3006		168.6
BP01PT	2017-06-26 04:33:17	3007		168.8
BP01PT	2017-06-26 04:33:31	3008		169
BP01PT	2017-06-26 04:33:45	3009		169.2
BP01PT	2017-06-26 04:34:00	3010		169.4
BP01PT	2017-06-26 04:34:15	3011		169.6
BP01PT	2017-06-26 04:34:29	3012		169.8
BP01PT	2017-06-26 04:34:30	3013		170
BP01PT	2017-06-26 04:34:44	3014		170.2
BP01PT	2017-06-26 04:35:00	3015		170.4
BP01PT	2017-06-26 04:35:14	3016		170.6
BP01PT	2017-06-26 04:35:15	3017		170.8
BP01PT	2017-06-26 04:35:30	3018		171
BP01PT	2017-06-26 04:35:47	3019		171.2
BP01PT	2017-06-26 04:36:01	3020		171.4
BP01PT	2017-06-26 04:36:14	3021		171.6
BP01PT	2017-06-26 04:36:15	3022		171.8
BP01PT	2017-06-26 04:36:30	3023		172
BP01PT	2017-06-26 04:36:47	3024		172.2
BP01PT	2017-06-26 04:37:08	3025		172.4
BP01PT	2017-06-26 04:37:26	3026		172.6
BP01PT	2017-06-26 04:37:48	3027		172.8
BP01PT	2017-06-26 04:37:49	3028		173
BP01PT	2017-06-26 04:38:11	3029		173.2
BP01PT	2017-06-26 04:38:39	3030		173.4
BP01PT	2017-06-26 04:39:05	3031		173.6
BP01PT	2017-06-26 04:39:31	3032		173.8
BP01PT	2017-06-26 04:40:01	3033		174
BP01PT	2017-06-26 04:40:33	3034		174.2
BP01PT	2017-06-26 04:41:07	3035		174.4
BP01PT	2017-06-26 04:41:08	3036		174.6
BP01PT	2017-06-26 04:41:44	3037		174.8
BP01PT	2017-06-26 04:42:15	3038		175
BP01PT	2017-06-26 04:42:16	3039		175.2
BP01PT	2017-06-26 04:42:49	3040		175.4
BP01PT	2017-06-26 04:43:14	3041		175.6
BP01PT	2017-06-26 04:43:15	3042		175.8
BP01PT	2017-06-26 04:43:43	3043		176
BP01PT	2017-06-26 04:44:08	3044		176.2
BP01PT	2017-06-26 04:44:38	3045		176.4
BP01PT	2017-06-26 04:45:07	3047		176.6
BP01PT	2017-06-26 04:45:30	3048		176.8
BP01PT	2017-06-26 04:45:54	3049		177
BP01PT	2017-06-26 04:46:21	3050		177.2
BP01PT	2017-06-26 04:46:22	3051		177.4
BP01PT	2017-06-26 04:46:49	3052		177.6
BP01PT	2017-06-26 04:47:14	3053		177.8
BP01PT	2017-06-26 04:47:38	3054		178
BP01PT	2017-06-26 04:48:04	3055		178.2
BP01PT	2017-06-26 04:48:28	3056		178.4
BP01PT	2017-06-26 04:48:51	3057		178.6
BP01PT	2017-06-26 04:49:19	3058		178.8
BP01PT	2017-06-26 04:49:48	3059		179
BP01PT	2017-06-26 04:50:15	3060		179.2
BP01PT	2017-06-26 04:50:42	3061		179.4
BP01PT	2017-06-26 04:51:06	3062		179.6
BP01PT	2017-06-26 04:51:35	3063		179.8
BP01PT	2017-06-26 04:52:09	3064		180
BP01PT	2017-06-26 04:52:41	3065		180.2
BP01PT	2017-06-26 04:53:14	3066		180.4
BP01PT	2017-06-26 04:53:52	3067		180.6
BP01PT	2017-06-26 04:53:53	3068		180.8
BP01PT	2017-06-26 04:54:34	3069		181
BP01PT	2017-06-26 04:55:20	3070		181.2
BP01PT	2017-06-26 04:56:04	3071		181.4
BP01PT	2017-06-26 04:56:05	3072		181.6
BP01PT	2017-06-26 04:56:51	3073		181.8
BP01PT	2017-06-26 04:57:34	3074		182
BP01PT	2017-06-26 04:58:17	3075		182.2
BP01PT	2017-06-26 04:58:49	3076		182.4
BP01PT	2017-06-26 04:59:17	3077		182.6
BP01PT	2017-06-26 04:59:40	3078		182.8
BP01PT	2017-06-26 05:00:08	3080		183
BP01PT	2017-06-26 05:00:34	3081		183.2
BP01PT	2017-06-26 05:01:04	3082		183.4
BP01PT	2017-06-26 05:01:37	3083		183.6
BP01PT	2017-06-26 05:02:18	3084		183.8
BP01PT	2017-06-26 05:02:54	3085		184
BP01PT	2017-06-26 05:03:29	3086		184.2
BP01PT	2017-06-26 05:04:08	3087		184.4
BP01PT	2017-06-26 05:04:45	3088		184.6
BP01PT	2017-06-26 05:05:25	3089		184.8
BP01PT	2017-06-26 05:06:07	3090		185
BP01PT	2017-06-26 05:07:03	3091		185.2
BP01PT	2017-06-26 05:08:18	3092		185.4
BP01PT	2017-06-26 05:09:38	3093		185.6
BP01PT	2017-06-26 05:11:14	3094		185.8
BP01PT	2017-06-26 05:13:00	3095		186
BP01PT	2017-06-26 05:15:04	3097		186.2
BP01PT	2017-06-26 05:17:44	3098		186.4
BP01PT	2017-06-26 05:21:03	3099		186.6
BP01PT	2017-06-26 05:34:55	3101		186.8
BP01PT	2017-06-26 05:49:40	3103		187
BP01PT	2017-06-26 05:57:26	3104		187.2
BP01PT	2017-06-26 05:57:27	3105		187.4
BP01PT	2017-06-26 06:02:30	3107		187.6
BP01PT	2017-06-26 06:06:21	3108		187.8
BP01PT	2017-06-26 06:19:07	3110		188
BP01PT	2017-06-26 08:15:38	3120		188		Logged	Logged
BP01PT	2017-06-26 08:30:00	1	26.195	0
BP01PT	2017-06-27 16:26:48	129		0.2
BP01PT	2017-06-27 16:32:33	131		0.4
BP01PT	2017-06-27 16:36:36	132		0.6
BP01PT	2017-06-27 16:39:15	133		0.8
BP01PT	2017-06-28 05:22:14	185		1
BP01PT	2017-06-28 06:36:41	191		1.2
BP01PT	2017-06-28 06:36:42	192		1.4
BP01PT	2017-06-29 00:46:08	266		1.6
BP01PT	2017-06-29 01:04:45	268		1.8
BP01PT	2017-06-29 01:14:38	269		2
BP01PT	2017-06-29 01:27:58	271		2.2
BP01PT	2017-06-29 01:56:31	274		2.4
BP01PT	2017-06-29 04:30:49	286		2.6
BP01PT	2017-06-30 06:28:23	390		2.8
BP01PT	2017-06-30 12:42:44	416		3
BP01PT	2017-06-30 12:52:32	418		3.2
BP01PT	2017-06-30 13:02:50	420		3.4
BP01PT	2017-06-30 13:05:09	421		3.6
BP01PT	2017-06-30 13:05:10	422		3.8
BP01PT	2017-06-30 13:05:58	423		4
BP01PT	2017-06-30 13:06:45	424		4.2
BP01PT	2017-06-30 13:06:46	425		4.4
BP01PT	2017-06-30 13:07:46	426		4.6
BP01PT	2017-06-30 13:08:27	427		4.8
BP01PT	2017-06-30 13:09:25	428		5
BP01PT	2017-06-30 13:09:26	429		5.2
BP01PT	2017-06-30 13:10:54	430		5.4
BP01PT	2017-06-30 13:11:58	431		5.6
BP01PT	2017-06-30 13:14:07	432		5.8
BP01PT	2017-06-30 13:15:44	434		6
BP01PT	2017-06-30 13:17:11	435		6.2
BP01PT	2017-06-30 13:18:43	436		6.4
BP01PT	2017-06-30 15:16:12	445		6.6
BP01PT	2017-06-30 15:22:50	446		6.8
BP01PT	2017-06-30 15:31:01	448		7
BP01PT	2017-06-30 15:36:56	449		7.2
BP01PT	2017-07-03 19:07:36	752		7.4
BP01PT	2017-07-03 19:07:37	753		7.6
BP01PT	2017-07-03 19:09:50	754		7.8
BP01PT	2017-07-03 20:07:59	759		8
BP01PT	2017-07-03 20:11:36	760		8.2
BP01PT	2017-07-03 20:20:10	762		8.4
BP01PT	2017-07-03 20:25:09	763		8.6
BP01PT	2017-07-03 20:38:34	765		8.8
BP01PT	2017-07-03 21:59:39	771		9
BP01PT	2017-07-03 21:59:40	772		9.2
BP01PT	2017-07-03 22:20:15	775		9.4
BP01PT	2017-07-03 22:46:14	778		9.6
BP01PT	2017-07-03 23:14:36	780		9.8
BP01PT	2017-07-03 23:16:37	782		10
BP01PT	2017-07-03 23:16:38	783		10.2
BP01PT	2017-07-03 23:17:48	784		10.4
BP01PT	2017-07-03 23:18:55	785		10.6
BP01PT	2017-07-03 23:22:11	786		10.8
BP01PT	2017-07-03 23:22:12	787		11
BP01PT	2017-07-03 23:25:28	788		11.2
BP01PT	2017-07-03 23:27:22	789		11.4
BP01PT	2017-07-03 23:28:08	790		11.6
BP01PT	2017-07-03 23:29:45	791		11.8
BP01PT	2017-07-03 23:31:58	793		12
BP01PT	2017-07-03 23:34:44	794		12.2
BP01PT	2017-07-03 23:40:42	795		12.4
BP01PT	2017-07-03 23:52:13	797		12.6
BP01PT	2017-07-04 00:31:32	801		12.8
BP01PT	2017-07-04 00:31:33	802		13
BP01PT	2017-07-04 00:33:55	803		13.2
BP01PT	2017-07-04 00:33:56	804		13.4
BP01PT	2017-07-04 00:36:33	805		13.6
BP01PT	2017-07-04 00:36:34	806		13.8
BP01PT	2017-07-04 00:38:57	807		14
BP01PT	2017-07-04 00:45:54	809		14.2
BP01PT	2017-07-04 00:47:54	810		14.4
BP01PT	2017-07-04 00:49:18	811		14.6
BP01PT	2017-07-04 00:50:30	812		14.8
BP01PT	2017-07-04 00:50:31	813		15
BP01PT	2017-07-04 00:51:23	814		15.2
BP01PT	2017-07-04 00:52:13	815		15.4
BP01PT	2017-07-04 00:52:14	816		15.6
BP01PT	2017-07-04 00:53:00	817		15.8
BP01PT	2017-07-04 00:53:32	818		16
BP01PT	2017-07-04 00:53:33	819		16.2
BP01PT	2017-07-04 00:54:03	820		16.4
BP01PT	2017-07-04 00:54:04	821		16.6
BP01PT	2017-07-04 00:54:34	822		16.8
BP01PT	2017-07-04 00:55:03	823		17
BP01PT	2017-07-04 00:55:25	824		17.2
BP01PT	2017-07-04 00:55:46	825		17.4
BP01PT	2017-07-04 00:56:02	826		17.6
BP01PT	2017-07-04 00:56:19	827		17.8
BP01PT	2017-07-04 00:56:36	828		18
BP01PT	2017-07-04 00:56:53	829		18.2
BP01PT	2017-07-04 00:57:09	830		18.4
BP01PT	2017-07-04 00:57:24	831		18.6
BP01PT	2017-07-04 00:57:41	832		18.8
BP01PT	2017-07-04 00:57:58	833		19
BP01PT	2017-07-04 00:57:59	834		19.2
BP01PT	2017-07-04 00:58:20	835		19.4
BP01PT	2017-07-04 00:58:40	836		19.6
BP01PT	2017-07-04 00:59:03	837		19.8
BP01PT	2017-07-04 00:59:21	838		20
BP01PT	2017-07-04 00:59:22	839		20.2
BP01PT	2017-07-04 00:59:43	840		20.4
BP01PT	2017-07-04 01:00:08	842		20.6
BP01PT	2017-07-04 01:00:39	843		20.8
BP01PT	2017-07-04 01:01:05	844		21
BP01PT	2017-07-04 01:01:29	845		21.2
BP01PT	2017-07-04 01:01:52	846		21.4
BP01PT	2017-07-04 01:02:14	847		21.6
BP01PT	2017-07-04 01:02:37	848		21.8
BP01PT	2017-07-04 01:03:01	849		22
BP01PT	2017-07-04 01:03:24	850		22.2
BP01PT	2017-07-04 01:03:48	851		22.4
BP01PT	2017-07-04 01:04:13	852		22.6
BP01PT	2017-07-04 01:04:34	853		22.8
BP01PT	2017-07-04 01:04:53	854		23
BP01PT	2017-07-04 01:05:08	855		23.2
BP01PT	2017-07-04 01:05:25	856		23.4
BP01PT	2017-07-04 01:05:41	857		23.6
BP01PT	2017-07-04 01:05:55	858		23.8
BP01PT	2017-07-04 01:06:08	859		24
BP01PT	2017-07-04 01:06:22	860		24.2
BP01PT	2017-07-04 01:06:23	861		24.4
BP01PT	2017-07-04 01:06:37	862		24.6
BP01PT	2017-07-04 01:06:55	863		24.8
BP01PT	2017-07-04 01:07:13	864		25
BP01PT	2017-07-04 01:07:32	865		25.2
BP01PT	2017-07-04 01:07:53	866		25.4
BP01PT	2017-07-04 01:08:15	867		25.6
BP01PT	2017-07-04 01:08:36	868		25.8
BP01PT	2017-07-04 01:08:59	869		26
BP01PT	2017-07-04 01:09:23	870		26.2
BP01PT	2017-07-04 01:09:48	871		26.4
BP01PT	2017-07-04 01:10:17	872		26.6
BP01PT	2017-07-04 01:10:45	873		26.8
BP01PT	2017-07-04 01:11:10	874		27
BP01PT	2017-07-04 01:11:36	875		27.2
BP01PT	2017-07-04 01:12:04	876		27.4
BP01PT	2017-07-04 01:12:26	877		27.6
BP01PT	2017-07-04 01:12:27	878		27.8
BP01PT	2017-07-04 01:12:52	879		28
BP01PT	2017-07-04 01:13:17	880		28.2
BP01PT	2017-07-04 01:13:44	881		28.4
BP01PT	2017-07-04 01:14:19	882		28.6
BP01PT	2017-07-04 01:14:56	883		28.8
BP01PT	2017-07-04 01:14:57	884		29
BP01PT	2017-07-04 01:15:34	886		29.2
BP01PT	2017-07-04 01:16:05	887		29.4
BP01PT	2017-07-04 01:16:33	888		29.6
BP01PT	2017-07-04 01:16:52	889		29.8
BP01PT	2017-07-04 01:17:07	890		30
BP01PT	2017-07-04 01:17:24	891		30.2
BP01PT	2017-07-04 01:17:42	892		30.4
BP01PT	2017-07-04 01:18:02	893		30.6
BP01PT	2017-07-04 01:18:28	894		30.8
BP01PT	2017-07-04 01:19:02	895		31
BP01PT	2017-07-04 01:19:33	896		31.2
BP01PT	2017-07-04 01:20:02	897		31.4
BP01PT	2017-07-04 01:20:29	898		31.6
BP01PT	2017-07-04 01:20:56	899		31.8
BP01PT	2017-07-04 01:21:23	900		32
BP01PT	2017-07-04 01:21:56	901		32.2
BP01PT	2017-07-04 01:21:57	902		32.4
BP01PT	2017-07-04 01:22:29	903		32.6
BP01PT	2017-07-04 01:23:05	904		32.8
BP01PT	2017-07-04 01:23:35	905		33
BP01PT	2017-07-04 01:24:00	906		33.2
BP01PT	2017-07-04 01:24:24	907		33.4
BP01PT	2017-07-04 01:24:25	908		33.6
BP01PT	2017-07-04 01:24:50	909		33.8
BP01PT	2017-07-04 01:24:51	910		34
BP01PT	2017-07-04 01:25:19	911		34.2
BP01PT	2017-07-04 01:25:49	912		34.4
BP01PT	2017-07-04 01:26:22	913		34.6
BP01PT	2017-07-04 01:27:05	914		34.8
BP01PT	2017-07-04 01:27:49	915		35
BP01PT	2017-07-04 01:28:37	916		35.2
BP01PT	2017-07-04 01:29:30	917		35.4
BP01PT	2017-07-04 01:30:32	919		35.6
BP01PT	2017-07-04 01:31:34	920		35.8
BP01PT	2017-07-04 01:32:32	921		36
BP01PT	2017-07-04 01:33:24	922		36.2
BP01PT	2017-07-04 01:34:21	923		36.4
BP01PT	2017-07-04 01:35:20	924		36.6
BP01PT	2017-07-04 01:36:26	925		36.8
BP01PT	2017-07-04 01:37:46	926		37
BP01PT	2017-07-04 01:39:27	927		37.2
BP01PT	2017-07-04 01:41:06	928		37.4
BP01PT	2017-07-04 01:42:52	929		37.6
BP01PT	2017-07-04 01:44:55	930		37.8
BP01PT	2017-07-04 01:44:56	931		38
BP01PT	2017-07-04 01:46:48	933		38.2
BP01PT	2017-07-04 01:48:55	934		38.4
BP01PT	2017-07-04 01:51:52	935		38.6
BP01PT	2017-07-04 01:51:53	936		38.8
BP01PT	2017-07-04 01:56:49	937		39
BP01PT	2017-07-04 02:03:38	939		39.2
BP01PT	2017-07-04 02:03:39	940		39.4
BP01PT	2017-07-04 02:07:11	941		39.6
BP01PT	2017-07-04 02:09:51	942		39.8
BP01PT	2017-07-04 02:14:20	943		40
BP01PT	2017-07-04 02:14:21	944		40.2
BP01PT	2017-07-04 02:19:13	946		40.4
BP01PT	2017-07-04 02:35:39	948		40.6
BP01PT	2017-07-04 11:36:18	985		40.8
BP01PT	2017-07-04 11:37:30	986		41
BP01PT	2017-07-04 11:37:51	987		41.2
BP01PT	2017-07-04 11:38:10	988		41.4
BP01PT	2017-07-04 11:39:06	989		41.6
BP01PT	2017-07-04 11:52:32	991		41.8
BP01PT	2017-07-04 11:58:30	992		42
BP01PT	2017-07-04 12:01:10	994		42.2
BP01PT	2017-07-04 12:03:55	995		42.4
BP01PT	2017-07-04 12:08:40	996		42.6
BP01PT	2017-07-04 12:57:22	1000		42.8
BP01PT	2017-07-04 14:26:27	1007		43
BP01PT	2017-07-04 14:31:56	1009		43.2
BP01PT	2017-07-04 14:36:26	1010		43.4
BP01PT	2017-07-04 14:42:26	1011		43.6
BP01PT	2017-07-04 19:22:29	1031		43.8
BP01PT	2017-07-04 19:24:59	1032		44
BP01PT	2017-07-04 19:29:03	1033		44.2
BP01PT	2017-07-04 19:32:05	1035		44.4
BP01PT	2017-07-04 19:43:59	1036		44.6
BP01PT	2017-07-05 01:58:36	1062		44.8
BP01PT	2017-07-05 13:53:59	1111		45
BP01PT	2017-07-05 15:20:59	1118		45.2
BP01PT	2017-07-05 15:22:26	1119		45.4
BP01PT	2017-07-05 15:23:10	1120		45.6
BP01PT	2017-07-05 15:23:50	1121		45.8
BP01PT	2017-07-05 15:24:16	1122		46
BP01PT	2017-07-05 15:24:40	1123		46.2
BP01PT	2017-07-05 15:25:03	1124		46.4
BP01PT	2017-07-05 15:25:28	1125		46.6
BP01PT	2017-07-05 15:25:48	1126		46.8
BP01PT	2017-07-05 15:26:12	1127		47
BP01PT	2017-07-05 15:26:32	1128		47.2
BP01PT	2017-07-05 15:26:51	1129		47.4
BP01PT	2017-07-05 15:27:13	1130		47.6
BP01PT	2017-07-05 15:27:38	1131		47.8
BP01PT	2017-07-05 15:28:06	1132		48
BP01PT	2017-07-05 15:28:36	1133		48.2
BP01PT	2017-07-05 15:29:10	1134		48.4
BP01PT	2017-07-05 15:29:37	1135		48.6
BP01PT	2017-07-05 15:30:10	1137		48.8
BP01PT	2017-07-05 15:30:52	1138		49
BP01PT	2017-07-05 15:31:34	1139		49.2
BP01PT	2017-07-05 15:32:03	1140		49.4
BP01PT	2017-07-05 15:32:38	1141		49.6
BP01PT	2017-07-05 15:33:08	1142		49.8
BP01PT	2017-07-05 15:33:40	1143		50
BP01PT	2017-07-05 15:34:08	1144		50.2
BP01PT	2017-07-05 15:34:34	1145		50.4
BP01PT	2017-07-05 15:35:11	1146		50.6
BP01PT	2017-07-05 15:35:51	1147		50.8
BP01PT	2017-07-05 15:35:52	1148		51
BP01PT	2017-07-05 15:36:32	1149		51.2
BP01PT	2017-07-05 15:37:26	1150		51.4
BP01PT	2017-07-05 15:38:22	1151		51.6
BP01PT	2017-07-05 15:38:23	1152		51.8
BP01PT	2017-07-05 15:39:18	1153		52
BP01PT	2017-07-05 15:40:14	1154		52.2
BP01PT	2017-07-05 15:41:22	1155		52.4
BP01PT	2017-07-05 15:41:23	1156		52.6
BP01PT	2017-07-05 15:42:11	1157		52.8
BP01PT	2017-07-05 15:43:21	1158		53
BP01PT	2017-07-05 15:44:42	1159		53.2
BP01PT	2017-07-05 15:46:01	1161		53.4
BP01PT	2017-07-05 15:47:03	1162		53.6
BP01PT	2017-07-05 15:47:50	1163		53.8
BP01PT	2017-07-05 15:48:45	1164		54
BP01PT	2017-07-05 15:49:53	1165		54.2
BP01PT	2017-07-05 15:50:56	1166		54.4
BP01PT	2017-07-05 15:51:53	1167		54.6
BP01PT	2017-07-05 15:53:04	1168		54.8
BP01PT	2017-07-05 15:54:25	1169		55
BP01PT	2017-07-05 15:55:52	1170		55.2
BP01PT	2017-07-05 15:55:53	1171		55.4
BP01PT	2017-07-05 15:57:13	1172		55.6
BP01PT	2017-07-05 16:00:15	1174		55.8
BP01PT	2017-07-05 16:00:16	1175		56
BP01PT	2017-07-05 16:02:19	1176		56.2
BP01PT	2017-07-05 16:04:32	1177		56.4
BP01PT	2017-07-05 16:06:36	1178		56.6
BP01PT	2017-07-05 16:08:46	1179		56.8
BP01PT	2017-07-05 16:11:37	1180		57
BP01PT	2017-07-05 16:19:54	1182		57.2
BP01PT	2017-07-05 16:23:19	1183		57.4
BP01PT	2017-07-05 16:24:54	1184		57.6
BP01PT	2017-07-05 16:26:22	1185		57.8
BP01PT	2017-07-05 16:28:00	1186		58
BP01PT	2017-07-05 16:29:23	1187		58.2
BP01PT	2017-07-05 16:30:30	1189		58.4
BP01PT	2017-07-05 16:31:57	1190		58.6
BP01PT	2017-07-05 16:33:06	1191		58.8
BP01PT	2017-07-05 16:35:01	1192		59
BP01PT	2017-07-05 16:36:02	1193		59.2
BP01PT	2017-07-05 16:37:05	1194		59.4
BP01PT	2017-07-05 16:38:03	1195		59.6
BP01PT	2017-07-05 16:38:49	1196		59.8
BP01PT	2017-07-05 16:39:44	1197		60
BP01PT	2017-07-05 16:39:45	1198		60.2
BP01PT	2017-07-05 16:40:46	1199		60.4
BP01PT	2017-07-05 16:42:26	1200		60.6
BP01PT	2017-07-05 16:46:16	1202		60.8
BP01PT	2017-07-05 16:54:17	1203		61
BP01PT	2017-07-05 16:54:18	1204		61.2
BP01PT	2017-07-05 16:58:43	1205		61.4
BP01PT	2017-07-05 17:03:48	1207		61.6
BP01PT	2017-07-05 20:23:39	1221		61.8
BP01PT	2017-07-06 15:17:44	1298		62
BP01PT	2017-07-06 15:20:14	1299		62.2
BP01PT	2017-07-06 15:21:24	1300		62.4
BP01PT	2017-07-06 15:21:25	1301		62.6
BP01PT	2017-07-06 15:22:05	1302		62.8
BP01PT	2017-07-06 15:22:47	1303		63
BP01PT	2017-07-06 15:23:32	1304		63.2
BP01PT	2017-07-06 15:24:38	1305		63.4
BP01PT	2017-07-06 15:25:48	1306		63.6
BP01PT	2017-07-06 15:26:35	1307		63.8
BP01PT	2017-07-06 15:26:36	1308		64
BP01PT	2017-07-06 15:27:24	1309		64.2
BP01PT	2017-07-06 15:28:09	1310		64.4
BP01PT	2017-07-06 15:28:38	1311		64.6
BP01PT	2017-07-06 15:29:16	1312		64.8
BP01PT	2017-07-06 15:29:48	1313		65
BP01PT	2017-07-06 15:30:20	1315		65.2
BP01PT	2017-07-06 15:30:21	1316		65.4
BP01PT	2017-07-06 15:31:11	1317		65.6
BP01PT	2017-07-06 15:31:52	1318		65.8
BP01PT	2017-07-06 15:31:53	1319		66
BP01PT	2017-07-06 15:34:27	1320		66.2
BP01PT	2017-07-07 18:17:31	1428		66.4
BP01PT	2017-07-08 06:38:01	1478		66.6
BP01PT	2017-07-08 06:42:34	1479		66.8
BP01PT	2017-07-08 06:46:11	1481		67
BP01PT	2017-07-08 06:50:29	1482		67.2
BP01PT	2017-07-08 22:01:15	1544		67.4
BP01PT	2017-07-08 22:20:40	1546		67.6
BP01PT	2017-07-08 22:44:23	1548		67.8
BP01PT	2017-07-08 22:44:24	1549		68
BP01PT	2017-07-08 23:01:35	1552		68.2
BP01PT	2017-07-08 23:35:30	1555		68.4
BP01PT	2017-07-08 23:43:09	1556		68.6
BP01PT	2017-07-08 23:47:30	1558		68.8
BP01PT	2017-07-08 23:50:34	1559		69
BP01PT	2017-07-08 23:53:42	1560		69.2
BP01PT	2017-07-08 23:57:02	1561		69.4
BP01PT	2017-07-09 00:00:46	1563		69.6
BP01PT	2017-07-09 00:04:38	1564		69.8
BP01PT	2017-07-09 00:08:43	1565		70
BP01PT	2017-07-09 00:11:47	1566		70.2
BP01PT	2017-07-09 00:11:48	1567		70.4
BP01PT	2017-07-09 00:14:57	1568		70.6
BP01PT	2017-07-09 00:18:26	1570		70.8
BP01PT	2017-07-09 00:18:27	1571		71
BP01PT	2017-07-09 00:22:12	1572		71.2
BP01PT	2017-07-09 00:25:37	1573		71.4
BP01PT	2017-07-09 00:28:28	1574		71.6
BP01PT	2017-07-09 00:28:29	1575		71.8
BP01PT	2017-07-09 00:31:06	1577		72
BP01PT	2017-07-09 00:33:56	1578		72.2
BP01PT	2017-07-09 00:37:36	1579		72.4
BP01PT	2017-07-09 00:42:34	1580		72.6
BP01PT	2017-07-09 00:49:12	1582		72.8
BP01PT	2017-07-09 00:56:23	1583		73
BP01PT	2017-07-09 01:06:59	1585		73.2
BP01PT	2017-07-09 01:15:03	1587		73.4
BP01PT	2017-07-09 01:24:40	1588		73.6
BP01PT	2017-07-09 01:24:41	1589		73.8
BP01PT	2017-07-09 01:31:19	1591		74
BP01PT	2017-07-09 01:35:32	1592		74.2
BP01PT	2017-07-09 01:39:53	1593		74.4
BP01PT	2017-07-09 01:39:54	1594		74.6
BP01PT	2017-07-09 01:43:27	1595		74.8
BP01PT	2017-07-09 01:48:53	1597		75
BP01PT	2017-07-09 01:48:54	1598		75.2
BP01PT	2017-07-09 02:02:04	1600		75.4
BP01PT	2017-07-09 02:21:54	1602		75.6
BP01PT	2017-07-09 02:24:59	1603		75.8
BP01PT	2017-07-09 02:28:37	1604		76
BP01PT	2017-07-09 02:32:22	1606		76.2
BP01PT	2017-07-09 02:37:33	1607		76.4
BP01PT	2017-07-09 02:53:41	1609		76.6
BP01PT	2017-07-09 02:53:42	1610		76.8
BP01PT	2017-07-09 04:00:01	1616		77
BP01PT	2017-07-09 04:00:02	1617		77.2
BP01PT	2017-07-09 04:12:09	1618		77.4
BP01PT	2017-07-09 04:45:43	1622		77.6
BP01PT	2017-07-09 04:53:06	1623		77.8
BP01PT	2017-07-09 04:56:25	1624		78
BP01PT	2017-07-09 04:58:38	1625		78.2
BP01PT	2017-07-09 05:00:16	1627		78.4
BP01PT	2017-07-09 05:01:40	1628		78.6
BP01PT	2017-07-09 05:03:41	1629		78.8
BP01PT	2017-07-09 05:05:56	1630		79
BP01PT	2017-07-09 05:05:57	1631		79.2
BP01PT	2017-07-09 05:09:18	1632		79.4
BP01PT	2017-07-09 05:13:58	1633		79.6
BP01PT	2017-07-09 05:21:36	1635		79.8
BP01PT	2017-07-09 05:31:10	1637		80
BP01PT	2017-07-09 05:39:23	1638		80.2
BP01PT	2017-07-09 05:44:48	1639		80.4
BP01PT	2017-07-09 05:50:45	1641		80.6
BP01PT	2017-07-09 05:57:14	1642		80.8
BP01PT	2017-07-09 06:07:31	1644		81
BP01PT	2017-07-09 06:16:39	1646		81.2
BP01PT	2017-07-09 06:25:39	1647		81.4
BP01PT	2017-07-09 06:32:20	1649		81.6
BP01PT	2017-07-09 06:47:02	1651		81.8
BP01PT	2017-07-09 18:24:58	1698		82
BP01PT	2017-07-09 18:36:28	1700		82.2
BP01PT	2017-07-09 18:50:45	1702		82.4
BP01PT	2017-07-09 19:02:21	1704		82.6
BP01PT	2017-07-09 19:05:08	1705		82.8
BP01PT	2017-07-09 19:05:09	1706		83
BP01PT	2017-07-09 19:07:24	1707		83.2
BP01PT	2017-07-09 19:07:25	1708		83.4
BP01PT	2017-07-09 19:08:40	1709		83.6
BP01PT	2017-07-09 19:09:51	1710		83.8
BP01PT	2017-07-09 19:11:43	1711		84
BP01PT	2017-07-09 19:14:27	1712		84.2
BP01PT	2017-07-09 19:18:21	1714		84.4
BP01PT	2017-07-09 19:22:32	1715		84.6
BP01PT	2017-07-09 19:22:33	1716		84.8
BP01PT	2017-07-09 19:25:02	1717		85
BP01PT	2017-07-09 19:27:40	1718		85.2
BP01PT	2017-07-09 19:37:59	1720		85.4
BP01PT	2017-07-09 19:46:37	1722		85.6
BP01PT	2017-07-09 19:51:14	1723		85.8
BP01PT	2017-07-09 20:00:05	1725		86
BP01PT	2017-07-09 20:00:06	1726		86.2
BP01PT	2017-07-09 20:13:48	1727		86.4
BP01PT	2017-07-09 20:29:37	1729		86.6
BP01PT	2017-07-09 20:54:16	1732		86.8
BP01PT	2017-07-09 21:00:06	1734		87
BP01PT	2017-07-09 21:03:36	1735		87.2
BP01PT	2017-07-09 21:05:50	1736		87.4
BP01PT	2017-07-09 21:07:54	1737		87.6
BP01PT	2017-07-09 21:07:55	1738		87.8
BP01PT	2017-07-09 21:09:29	1739		88
BP01PT	2017-07-09 21:13:00	1740		88.2
BP01PT	2017-07-09 21:43:30	1743		88.4
BP01PT	2017-07-09 21:53:01	1745		88.6
BP01PT	2017-07-09 21:57:12	1746		88.8
BP01PT	2017-07-09 22:01:01	1748		89
BP01PT	2017-07-09 22:07:38	1749		89.2
BP01PT	2017-07-09 22:17:30	1751		89.4
BP01PT	2017-07-09 22:31:32	1753		89.6
BP01PT	2017-07-09 23:15:37	1757		89.8
BP01PT	2017-07-09 23:22:16	1758		90
BP01PT	2017-07-09 23:25:45	1759		90.2
BP01PT	2017-07-09 23:25:46	1760		90.4
BP01PT	2017-07-09 23:58:22	1763		90.6
BP01PT	2017-07-10 06:53:08	1792		90.8
BP01PT	2017-07-10 06:55:06	1793		91
BP01PT	2017-07-10 06:55:07	1794		91.2
BP01PT	2017-07-10 06:58:52	1795		91.4
BP01PT	2017-07-10 07:13:35	1797		91.6
BP01PT	2017-07-10 07:13:36	1798		91.8
BP01PT	2017-07-10 07:55:35	1802		92
BP01PT	2017-07-10 13:10:25	1824		92.2
BP01PT	2017-07-10 13:11:04	1825		92.4
BP01PT	2017-07-10 13:11:52	1826		92.6
BP01PT	2017-07-10 13:13:09	1827		92.8
BP01PT	2017-07-10 13:19:26	1829		93
BP01PT	2017-07-10 13:23:11	1830		93.2
BP01PT	2017-07-10 13:27:04	1831		93.4
BP01PT	2017-07-10 13:34:54	1833		93.6
BP01PT	2017-07-10 13:34:55	1834		93.8
BP01PT	2017-07-10 13:42:50	1835		94
BP01PT	2017-07-10 13:48:10	1837		94.2
BP01PT	2017-07-10 13:55:43	1838		94.4
BP01PT	2017-07-10 13:59:38	1839		94.6
BP01PT	2017-07-10 13:59:39	1840		94.8
BP01PT	2017-07-10 14:01:42	1842		95
BP01PT	2017-07-10 14:02:37	1843		95.2
BP01PT	2017-07-10 14:03:46	1844		95.4
BP01PT	2017-07-10 14:16:48	1846		95.6
BP01PT	2017-07-11 02:35:37	1896		95.8
BP01PT	2017-07-11 16:05:09	1951		96
BP01PT	2017-07-11 16:18:00	1953		96.2
BP01PT	2017-07-11 18:31:03	1963		96.4
BP01PT	2017-07-14 21:23:31	2263		96.6
BP01PT	2017-07-14 21:36:21	2265		96.8
BP01PT	2017-07-14 23:42:40	2274		97
BP01PT	2017-07-14 23:56:44	2276		97.2
BP01PT	2017-07-14 23:56:45	2277		97.4
BP01PT	2017-07-15 00:01:56	2279		97.6
BP01PT	2017-07-15 00:07:43	2280		97.8
BP01PT	2017-07-15 00:14:43	2281		98
BP01PT	2017-07-15 00:21:56	2283		98.2
BP01PT	2017-07-15 00:21:57	2284		98.4
BP01PT	2017-07-15 00:27:29	2285		98.6
BP01PT	2017-07-15 00:31:15	2287		98.8
BP01PT	2017-07-15 00:35:25	2288		99
BP01PT	2017-07-15 00:35:26	2289		99.2
BP01PT	2017-07-15 00:38:57	2290		99.4
BP01PT	2017-07-15 00:42:58	2291		99.6
BP01PT	2017-07-15 00:42:59	2292		99.8
BP01PT	2017-07-15 00:47:12	2294		100
BP01PT	2017-07-15 00:51:38	2295		100.2
BP01PT	2017-07-15 00:55:35	2296		100.4
BP01PT	2017-07-15 00:55:36	2297		100.6
BP01PT	2017-07-15 00:58:00	2298		100.8
BP01PT	2017-07-15 01:00:03	2300		101
BP01PT	2017-07-15 01:01:53	2301		101.2
BP01PT	2017-07-15 01:01:54	2302		101.4
BP01PT	2017-07-15 01:04:22	2303		101.6
BP01PT	2017-07-15 01:08:12	2304		101.8
BP01PT	2017-07-15 01:12:20	2305		102
BP01PT	2017-07-15 01:16:25	2307		102.2
BP01PT	2017-07-15 01:22:26	2308		102.4
BP01PT	2017-07-15 01:27:51	2309		102.6
BP01PT	2017-07-15 01:31:04	2311		102.8
BP01PT	2017-07-15 01:33:46	2312		103
BP01PT	2017-07-15 01:33:47	2313		103.2
BP01PT	2017-07-15 01:36:25	2314		103.4
BP01PT	2017-07-15 01:39:18	2315		103.6
BP01PT	2017-07-15 01:39:19	2316		103.8
BP01PT	2017-07-15 01:42:06	2317		104
BP01PT	2017-07-15 01:44:48	2318		104.2
BP01PT	2017-07-15 01:47:10	2320		104.4
BP01PT	2017-07-15 01:49:17	2321		104.6
BP01PT	2017-07-15 01:51:18	2322		104.8
BP01PT	2017-07-15 01:53:29	2323		105
BP01PT	2017-07-15 01:55:27	2324		105.2
BP01PT	2017-07-15 01:57:55	2325		105.4
BP01PT	2017-07-15 02:00:55	2327		105.6
BP01PT	2017-07-15 02:00:56	2328		105.8
BP01PT	2017-07-15 02:03:32	2329		106
BP01PT	2017-07-15 02:05:39	2330		106.2
BP01PT	2017-07-15 02:05:40	2331		106.4
BP01PT	2017-07-15 02:08:35	2332		106.6
BP01PT	2017-07-15 02:11:20	2333		106.8
BP01PT	2017-07-15 02:11:21	2334		107
BP01PT	2017-07-15 02:14:52	2335		107.2
BP01PT	2017-07-15 02:18:58	2337		107.4
BP01PT	2017-07-15 02:23:08	2338		107.6
BP01PT	2017-07-15 02:26:58	2339		107.8
BP01PT	2017-07-15 02:32:08	2341		108
BP01PT	2017-07-15 02:37:32	2342		108.2
BP01PT	2017-07-15 02:46:31	2344		108.4
BP01PT	2017-07-15 03:02:19	2346		108.6
BP01PT	2017-07-15 03:22:55	2348		108.8
BP01PT	2017-07-15 04:40:39	2354		109
BP01PT	2017-07-15 05:43:26	2359		109.2
BP01PT	2017-07-16 01:47:16	2441		109.4
BP01PT	2017-07-16 01:56:29	2442		109.6
BP01PT	2017-07-16 02:05:11	2444		109.8
BP01PT	2017-07-16 02:12:48	2445		110
BP01PT	2017-07-16 02:17:11	2447		110.2
BP01PT	2017-07-16 02:21:00	2448		110.4
BP01PT	2017-07-16 02:24:39	2449		110.6
BP01PT	2017-07-16 02:28:49	2450		110.8
BP01PT	2017-07-16 02:32:49	2452		111
BP01PT	2017-07-16 02:36:25	2453		111.2
BP01PT	2017-07-16 02:39:38	2454		111.4
BP01PT	2017-07-16 02:43:00	2455		111.6
BP01PT	2017-07-16 02:46:58	2457		111.8
BP01PT	2017-07-16 02:49:58	2458		112
BP01PT	2017-07-16 02:52:20	2459		112.2
BP01PT	2017-07-16 02:55:12	2460		112.4
BP01PT	2017-07-16 02:57:56	2461		112.6
BP01PT	2017-07-16 03:00:43	2463		112.8
BP01PT	2017-07-16 03:04:11	2464		113
BP01PT	2017-07-16 03:04:12	2465		113.2
BP01PT	2017-07-16 03:09:43	2466		113.4
BP01PT	2017-07-16 03:17:28	2468		113.6
BP01PT	2017-07-16 15:59:01	2519		113.8
BP01PT	2017-07-16 16:03:49	2521		114
BP01PT	2017-07-16 16:06:32	2522		114.2
BP01PT	2017-07-16 16:11:45	2523		114.4
BP01PT	2017-07-16 17:31:55	2530		114.6
BP01PT	2017-07-16 22:47:11	2552		114.8
BP01PT	2017-07-16 23:22:00	2555		115
BP01PT	2017-07-16 23:26:40	2556		115.2
BP01PT	2017-07-16 23:46:33	2559		115.4
BP01PT	2017-07-17 00:04:04	2561		115.6
BP01PT	2017-07-17 00:13:31	2562		115.8
BP01PT	2017-07-17 01:11:56	2567		116
BP01PT	2017-07-17 04:55:02	2583		116.2
BP01PT	2017-07-17 21:27:53	2650		116.4
BP01PT	2017-07-18 00:50:57	2665		116.6
BP01PT	2017-07-18 01:14:11	2667		116.8
BP01PT	2017-07-18 18:51:47	2739		117
BP01PT	2017-07-18 18:52:08	2740		117.2
BP01PT	2017-07-18 18:52:09	2741		117.4
BP01PT	2017-07-18 18:52:49	2742		117.6
BP01PT	2017-07-18 18:53:29	2743		117.8
BP01PT	2017-07-18 18:54:29	2744		118
BP01PT	2017-07-18 18:55:30	2745		118.2
BP01PT	2017-07-18 18:56:09	2746		118.4
BP01PT	2017-07-18 18:56:22	2747		118.6
BP01PT	2017-07-18 18:56:23	2748		118.8
BP01PT	2017-07-18 18:56:36	2749		119
BP01PT	2017-07-18 18:56:54	2750		119.2
BP01PT	2017-07-18 18:57:05	2751		119.4
BP01PT	2017-07-18 18:57:15	2752		119.6
BP01PT	2017-07-18 18:57:27	2753		119.8
BP01PT	2017-07-18 18:57:38	2754		120
BP01PT	2017-07-18 18:57:39	2755		120.2
BP01PT	2017-07-18 18:57:50	2756		120.4
BP01PT	2017-07-18 18:58:03	2757		120.6
BP01PT	2017-07-18 18:58:16	2758		120.8
BP01PT	2017-07-18 18:58:28	2759		121
BP01PT	2017-07-18 18:58:38	2760		121.2
BP01PT	2017-07-18 18:58:48	2761		121.4
BP01PT	2017-07-18 18:59:02	2762		121.6
BP01PT	2017-07-18 18:59:14	2763		121.8
BP01PT	2017-07-18 18:59:27	2764		122
BP01PT	2017-07-18 18:59:34	2765		122.2
BP01PT	2017-07-18 18:59:35	2766		122.4
BP01PT	2017-07-18 18:59:42	2767		122.6
BP01PT	2017-07-18 18:59:50	2768		122.8
BP01PT	2017-07-18 18:59:58	2769		123
BP01PT	2017-07-18 19:00:05	2771		123.2
BP01PT	2017-07-18 19:00:11	2772		123.4
BP01PT	2017-07-18 19:00:18	2773		123.6
BP01PT	2017-07-18 19:00:25	2774		123.8
BP01PT	2017-07-18 19:00:34	2775		124
BP01PT	2017-07-18 19:00:44	2776		124.2
BP01PT	2017-07-18 19:00:52	2777		124.4
BP01PT	2017-07-18 19:01:01	2778		124.6
BP01PT	2017-07-18 19:01:11	2779		124.8
BP01PT	2017-07-18 19:01:22	2780		125
BP01PT	2017-07-18 19:01:34	2781		125.2
BP01PT	2017-07-18 19:01:49	2782		125.4
BP01PT	2017-07-18 19:02:28	2783		125.6
BP01PT	2017-07-19 00:15:43	2805		125.8
BP01PT	2017-07-19 17:16:07	2874		126
BP01PT	2017-07-19 17:26:00	2875		126.2
BP01PT	2017-07-19 17:31:43	2877		126.4
BP01PT	2017-07-19 17:35:10	2878		126.6
BP01PT	2017-07-19 17:38:48	2879		126.8
BP01PT	2017-07-19 17:44:28	2880		127
BP01PT	2017-07-19 17:52:15	2882		127.2
BP01PT	2017-07-19 18:20:48	2885		127.4
BP01PT	2017-07-19 18:42:42	2887		127.6
BP01PT	2017-07-19 21:13:12	2898		127.8
BP01PT	2017-07-19 21:13:13	2899		128
BP01PT	2017-07-19 21:23:30	2901		128.2
BP01PT	2017-07-19 21:27:22	2902		128.4
BP01PT	2017-07-19 21:27:23	2903		128.6
BP01PT	2017-07-19 21:30:27	2905		128.8
BP01PT	2017-07-19 21:33:09	2906		129
BP01PT	2017-07-19 21:35:55	2907		129.2
BP01PT	2017-07-19 21:42:34	2908		129.4
BP01PT	2017-07-19 21:42:35	2909		129.6
BP01PT	2017-07-19 21:50:19	2911		129.8
BP01PT	2017-07-19 21:55:54	2912		130
BP01PT	2017-07-19 22:01:38	2914		130.2
BP01PT	2017-07-19 22:09:32	2915		130.4
BP01PT	2017-07-19 22:15:44	2917		130.6
BP01PT	2017-07-19 22:29:56	2918		130.8
BP01PT	2017-07-19 22:38:19	2920		131
BP01PT	2017-07-19 22:44:35	2921		131.2
BP01PT	2017-07-19 23:03:06	2924		131.4
BP01PT	2017-07-19 23:57:37	2928		131.6
BP01PT	2017-07-20 00:04:40	2930		131.8
BP01PT	2017-07-20 00:13:05	2931		132
BP01PT	2017-07-20 02:27:55	2941		132.2
BP01PT	2017-07-20 15:25:23	2994		132.4
BP01PT	2017-07-20 15:28:29	2995		132.6
BP01PT	2017-07-20 18:20:51	3008		132.8
BP01PT	2017-07-21 10:56:16	3075		133
BP01PT	2017-07-21 12:49:49	3084		133.2
BP01PT	2017-07-21 12:52:06	3085		133.4
BP01PT	2017-07-21 21:15:16	3120		133.6
BP01PT	2017-07-21 23:37:55	3130		133.8
BP01PT	2017-07-21 23:40:00	3131		134
BP01PT	2017-07-21 23:40:22	3132		134.2
BP01PT	2017-07-21 23:40:42	3133		134.4
BP01PT	2017-07-21 23:41:04	3134		134.6
BP01PT	2017-07-21 23:41:05	3135		134.8
BP01PT	2017-07-21 23:41:31	3136		135
BP01PT	2017-07-21 23:41:32	3137		135.2
BP01PT	2017-07-21 23:42:06	3138		135.4
BP01PT	2017-07-21 23:43:09	3139		135.6
BP01PT	2017-07-21 23:45:20	3141		135.8
BP01PT	2017-07-21 23:53:27	3142		136
BP01PT	2017-07-21 23:56:48	3143		136.2
BP01PT	2017-07-22 00:00:01	3145		136.4
BP01PT	2017-07-22 00:00:02	3146		136.6
BP01PT	2017-07-22 00:03:07	3147		136.8
BP01PT	2017-07-22 00:10:07	3148		137
BP01PT	2017-07-22 01:21:08	3154		137.2
BP01PT	2017-07-22 02:36:28	3160		137.4
BP01PT	2017-07-22 02:37:23	3161		137.6
BP01PT	2017-07-22 02:38:17	3162		137.8
BP01PT	2017-07-22 02:38:18	3163		138
BP01PT	2017-07-22 02:39:12	3164		138.2
BP01PT	2017-07-22 02:39:36	3165		138.4
BP01PT	2017-07-22 02:39:58	3166		138.6
BP01PT	2017-07-22 02:39:59	3167		138.8
BP01PT	2017-07-22 02:40:26	3168		139
BP01PT	2017-07-22 02:41:06	3169		139.2
BP01PT	2017-07-22 02:41:45	3170		139.4
BP01PT	2017-07-22 02:42:17	3171		139.6
BP01PT	2017-07-22 02:42:50	3172		139.8
BP01PT	2017-07-22 02:43:11	3173		140
BP01PT	2017-07-22 02:43:12	3174		140.2
BP01PT	2017-07-22 02:43:31	3175		140.4
BP01PT	2017-07-22 02:43:32	3176		140.6
BP01PT	2017-07-22 02:43:53	3177		140.8
BP01PT	2017-07-22 02:44:12	3178		141
BP01PT	2017-07-22 02:44:29	3179		141.2
BP01PT	2017-07-22 02:44:46	3180		141.4
BP01PT	2017-07-22 02:45:01	3182		141.6
BP01PT	2017-07-22 02:45:20	3183		141.8
BP01PT	2017-07-22 02:45:39	3184		142
BP01PT	2017-07-22 02:45:58	3185		142.2
BP01PT	2017-07-22 02:46:19	3186		142.4
BP01PT	2017-07-22 02:46:58	3187		142.6
BP01PT	2017-07-22 02:47:32	3188		142.8
BP01PT	2017-07-22 02:48:25	3189		143
BP01PT	2017-07-22 02:49:02	3190		143.2
BP01PT	2017-07-22 02:49:03	3191		143.4
BP01PT	2017-07-22 02:49:41	3192		143.6
BP01PT	2017-07-22 02:50:51	3193		143.8
BP01PT	2017-07-22 02:52:19	3194		144
BP01PT	2017-07-22 02:53:30	3195		144.2
BP01PT	2017-07-22 02:54:42	3196		144.4
BP01PT	2017-07-22 02:56:17	3197		144.6
BP01PT	2017-07-22 02:57:48	3198		144.8
BP01PT	2017-07-22 02:58:25	3199		145
BP01PT	2017-07-22 02:58:59	3200		145.2
BP01PT	2017-07-22 02:59:00	3201		145.4
BP01PT	2017-07-22 02:59:37	3202		145.6
BP01PT	2017-07-22 03:00:13	3204		145.8
BP01PT	2017-07-22 03:00:37	3205		146
BP01PT	2017-07-22 03:00:38	3206		146.2
BP01PT	2017-07-22 03:00:55	3207		146.4
BP01PT	2017-07-22 03:01:07	3208		146.6
BP01PT	2017-07-22 03:01:20	3209		146.8
BP01PT	2017-07-22 03:01:32	3210		147
BP01PT	2017-07-22 03:01:47	3211		147.2
BP01PT	2017-07-22 03:02:02	3212		147.4
BP01PT	2017-07-22 03:02:14	3213		147.6
BP01PT	2017-07-22 03:02:15	3214		147.8
BP01PT	2017-07-22 03:02:28	3215		148
BP01PT	2017-07-22 03:02:43	3216		148.2
BP01PT	2017-07-22 03:02:55	3217		148.4
BP01PT	2017-07-22 03:03:06	3218		148.6
BP01PT	2017-07-22 03:03:18	3219		148.8
BP01PT	2017-07-22 03:03:37	3220		149
BP01PT	2017-07-22 03:03:53	3221		149.2
BP01PT	2017-07-22 03:04:06	3222		149.4
BP01PT	2017-07-22 03:04:23	3223		149.6
BP01PT	2017-07-22 03:04:37	3224		149.8
BP01PT	2017-07-22 03:04:47	3225		150
BP01PT	2017-07-22 03:04:56	3226		150.2
BP01PT	2017-07-22 03:05:07	3227		150.4
BP01PT	2017-07-22 03:05:32	3228		150.6
BP01PT	2017-07-22 03:05:54	3229		150.8
BP01PT	2017-07-22 03:07:51	3230		151
BP01PT	2017-07-22 03:42:53	3233		151.2
BP01PT	2017-07-22 04:33:43	3238		151.4
BP01PT	2017-07-22 10:57:33	3264		151.6
BP01PT	2017-07-22 10:58:00	3265		151.8
BP01PT	2017-07-22 10:58:16	3266		152
BP01PT	2017-07-22 10:58:34	3267		152.2
BP01PT	2017-07-22 10:59:10	3268		152.4
BP01PT	2017-07-22 11:00:33	3270		152.6
BP01PT	2017-07-22 20:03:28	3307		152.8
BP01PT	2017-07-22 20:03:29	3308		153
BP01PT	2017-07-22 20:12:01	3309		153.2
BP01PT	2017-07-22 20:25:04	3311		153.4
BP01PT	2017-07-22 20:27:15	3312		153.6
BP01PT	2017-07-22 20:28:46	3313		153.8
BP01PT	2017-07-22 21:50:39	3320		154
BP01PT	2017-07-22 21:55:39	3321		154.2
BP01PT	2017-07-22 21:58:38	3322		154.4
BP01PT	2017-07-22 22:01:16	3324		154.6
BP01PT	2017-07-22 22:03:08	3325		154.8
BP01PT	2017-07-22 22:05:47	3326		155
BP01PT	2017-07-22 22:08:55	3327		155.2
BP01PT	2017-07-22 22:12:31	3328		155.4
BP01PT	2017-07-22 22:16:50	3330		155.6
BP01PT	2017-07-22 22:20:51	3331		155.8
BP01PT	2017-07-22 22:24:03	3332		156
BP01PT	2017-07-22 22:26:19	3333		156.2
BP01PT	2017-07-22 22:28:18	3334		156.4
BP01PT	2017-07-22 22:30:36	3336		156.6
BP01PT	2017-07-22 22:33:07	3337		156.8
BP01PT	2017-07-22 22:35:27	3338		157
BP01PT	2017-07-22 22:37:51	3339		157.2
BP01PT	2017-07-22 22:40:22	3340		157.4
BP01PT	2017-07-22 22:45:45	3342		157.6
BP01PT	2017-07-22 22:58:58	3343		157.8
BP01PT	2017-07-22 23:36:47	3347		158
BP01PT	2017-07-22 23:41:28	3348		158.2
BP01PT	2017-07-22 23:43:42	3349		158.4
BP01PT	2017-07-22 23:43:43	3350		158.6
BP01PT	2017-07-22 23:45:13	3352		158.8
BP01PT	2017-07-22 23:46:41	3353		159
BP01PT	2017-07-22 23:49:17	3354		159.2
BP01PT	2017-07-22 23:52:40	3355		159.4
BP01PT	2017-07-22 23:57:35	3356		159.6
BP01PT	2017-07-22 23:57:36	3357		159.8
BP01PT	2017-07-23 00:00:26	3359		160
BP01PT	2017-07-23 00:04:21	3360		160.2
BP01PT	2017-07-23 00:06:46	3361		160.4
BP01PT	2017-07-23 00:07:39	3362		160.6
BP01PT	2017-07-23 00:08:27	3363		160.8
BP01PT	2017-07-23 00:09:01	3364		161
BP01PT	2017-07-23 00:09:45	3365		161.2
BP01PT	2017-07-23 00:11:31	3366		161.4
BP01PT	2017-07-23 00:15:59	3368		161.6
BP01PT	2017-07-23 00:16:46	3369		161.8
BP01PT	2017-07-23 00:17:11	3370		162
BP01PT	2017-07-23 00:17:37	3371		162.2
BP01PT	2017-07-23 00:17:38	3372		162.4
BP01PT	2017-07-23 00:18:19	3373		162.6
BP01PT	2017-07-23 00:18:58	3374		162.8
BP01PT	2017-07-23 00:19:41	3375		163
BP01PT	2017-07-23 00:21:59	3376		163.2
BP01PT	2017-07-23 00:24:11	3377		163.4
BP01PT	2017-07-23 01:28:05	3382		163.6
BP01PT	2017-07-23 01:31:56	3384		163.8
BP01PT	2017-07-23 01:34:25	3385		164
BP01PT	2017-07-23 01:45:31	3387		164.2
BP01PT	2017-07-23 17:23:59	3450		164.4
BP01PT	2017-07-23 17:36:39	3452		164.6
BP01PT	2017-07-23 17:39:48	3453		164.8
BP01PT	2017-07-23 17:46:15	3455		165
BP01PT	2017-07-23 17:50:57	3456		165.2
BP01PT	2017-07-23 17:52:36	3457		165.4
BP01PT	2017-07-23 17:53:44	3458		165.6
BP01PT	2017-07-23 17:54:42	3459		165.8
BP01PT	2017-07-23 17:55:30	3460		166
BP01PT	2017-07-23 17:56:01	3461		166.2
BP01PT	2017-07-23 17:56:32	3462		166.4
BP01PT	2017-07-23 17:57:15	3463		166.6
BP01PT	2017-07-23 17:58:32	3464		166.8
BP01PT	2017-07-23 18:00:16	3466		167
BP01PT	2017-07-23 18:00:17	3467		167.2
BP01PT	2017-07-23 18:01:44	3468		167.4
BP01PT	2017-07-23 18:03:14	3469		167.6
BP01PT	2017-07-23 18:08:25	3470		167.8
BP01PT	2017-07-23 18:10:13	3471		168
BP01PT	2017-07-23 18:14:26	3472		168.2
BP01PT	2017-07-23 18:27:56	3474		168.4
BP01PT	2017-07-23 18:40:17	3476		168.6
BP01PT	2017-07-23 18:45:01	3478		168.8
BP01PT	2017-07-23 18:48:43	3479		169
BP01PT	2017-07-23 18:51:46	3480		169.2
BP01PT	2017-07-23 18:55:19	3481		169.4
BP01PT	2017-07-23 19:57:27	3486		169.6
BP01PT	2017-07-23 21:14:22	3492		169.8
BP01PT	2017-07-23 21:16:14	3494		170
BP01PT	2017-07-23 21:17:31	3495		170.2
BP01PT	2017-07-23 21:18:54	3496		170.4
BP01PT	2017-07-23 21:19:59	3497		170.6
BP01PT	2017-07-23 21:20:39	3498		170.8
BP01PT	2017-07-23 21:21:15	3499		171
BP01PT	2017-07-23 21:22:03	3500		171.2
BP01PT	2017-07-23 21:23:10	3501		171.4
BP01PT	2017-07-23 21:25:08	3502		171.6
BP01PT	2017-07-23 21:26:38	3503		171.8
BP01PT	2017-07-23 21:27:08	3504		172
BP01PT	2017-07-23 21:27:09	3505		172.2
BP01PT	2017-07-23 21:27:40	3506		172.4
BP01PT	2017-07-23 21:28:18	3507		172.6
BP01PT	2017-07-23 21:29:03	3508		172.8
BP01PT	2017-07-23 21:29:48	3509		173
BP01PT	2017-07-23 21:30:32	3511		173.2
BP01PT	2017-07-23 21:31:28	3512		173.4
BP01PT	2017-07-23 21:32:47	3513		173.6
BP01PT	2017-07-23 21:34:43	3514		173.8
BP01PT	2017-07-23 21:37:24	3515		174
BP01PT	2017-07-23 21:44:15	3516		174.2
BP01PT	2017-07-23 21:46:53	3518		174.4
BP01PT	2017-07-23 21:56:34	3519		174.6
BP01PT	2017-07-23 22:02:56	3521		174.8
BP01PT	2017-07-23 22:04:25	3522		175
BP01PT	2017-07-23 22:06:28	3523		175.2
BP01PT	2017-07-23 22:09:22	3524		175.4
BP01PT	2017-07-23 23:04:20	3529		175.6
BP01PT	2017-07-23 23:11:37	3530		175.8
BP01PT	2017-07-23 23:15:54	3532		176
BP01PT	2017-07-23 23:19:13	3533		176.2
BP01PT	2017-07-23 23:22:08	3534		176.4
BP01PT	2017-07-23 23:24:38	3535		176.6
BP01PT	2017-07-23 23:26:53	3536		176.8
BP01PT	2017-07-23 23:29:11	3537		177
BP01PT	2017-07-23 23:31:41	3539		177.2
BP01PT	2017-07-23 23:34:19	3540		177.4
BP01PT	2017-07-23 23:37:21	3541		177.6
BP01PT	2017-07-23 23:40:49	3542		177.8
BP01PT	2017-07-23 23:44:49	3543		178
BP01PT	2017-07-23 23:48:47	3545		178.2
BP01PT	2017-07-23 23:53:40	3546		178.4
BP01PT	2017-07-23 23:58:05	3547		178.6
BP01PT	2017-07-24 00:02:56	3549		178.8
BP01PT	2017-07-24 00:09:38	3550		179
BP01PT	2017-07-24 00:16:29	3552		179.2
BP01PT	2017-07-24 00:25:30	3553		179.4
BP01PT	2017-07-24 00:52:32	3556		179.6
BP01PT	2017-07-24 01:20:09	3559		179.8
BP01PT	2017-07-24 01:33:54	3561		180
BP01PT	2017-07-24 01:47:18	3563		180.2
BP01PT	2017-07-24 02:05:13	3565		180.4
BP01PT	2017-07-24 22:31:55	3648		180.6
BP01PT	2017-07-24 22:35:42	3649		180.8
BP01PT	2017-07-24 22:37:11	3650		181
BP01PT	2017-07-24 22:37:56	3651		181.2
BP01PT	2017-07-24 22:38:42	3652		181.4
BP01PT	2017-07-24 22:39:32	3653		181.6
BP01PT	2017-07-24 22:40:29	3654		181.8
BP01PT	2017-07-24 22:42:02	3655		182
BP01PT	2017-07-24 22:45:55	3657		182.2
BP01PT	2017-07-24 22:53:39	3658		182.4
BP01PT	2017-07-24 23:03:07	3660		182.6
BP01PT	2017-07-24 23:08:48	3661		182.8
BP01PT	2017-07-24 23:15:21	3663		183
BP01PT	2017-07-24 23:19:11	3664		183.2
BP01PT	2017-07-24 23:23:56	3665		183.4
BP01PT	2017-07-24 23:28:46	3666		183.6
BP01PT	2017-07-25 02:12:14	3678		183.8
BP01PT	2017-07-25 08:05:33	3703		184
BP01PT	2017-07-25 08:33:34	3706		184.2
BP01PT	2017-07-25 17:13:11	3741		184.4
BP01PT	2017-07-25 17:18:45	3743		184.6
BP01PT	2017-07-25 17:21:44	3744		184.8
BP01PT	2017-07-25 17:23:49	3745		185
BP01PT	2017-07-25 17:24:34	3746		185.2
BP01PT	2017-07-25 17:25:22	3747		185.4
BP01PT	2017-07-25 17:26:35	3748		185.6
BP01PT	2017-07-25 17:27:59	3749		185.8
BP01PT	2017-07-25 17:29:55	3750		186
BP01PT	2017-07-25 17:32:03	3752		186.2
BP01PT	2017-07-25 17:33:54	3753		186.4
BP01PT	2017-07-25 17:35:00	3754		186.6
BP01PT	2017-07-25 17:35:58	3755		186.8
BP01PT	2017-07-25 17:37:01	3756		187
BP01PT	2017-07-25 17:38:32	3757		187.2
BP01PT	2017-07-25 17:38:33	3758		187.4
BP01PT	2017-07-25 17:40:23	3759		187.6
BP01PT	2017-07-25 17:42:05	3760		187.8
BP01PT	2017-07-25 17:42:06	3761		188
BP01PT	2017-07-25 17:43:44	3762		188.2
BP01PT	2017-07-25 17:45:42	3764		188.4
BP01PT	2017-07-25 17:47:43	3765		188.6
BP01PT	2017-07-25 17:49:37	3766		188.8
BP01PT	2017-07-25 17:51:59	3767		189
BP01PT	2017-07-25 17:54:13	3768		189.2
BP01PT	2017-07-25 17:56:20	3769		189.4
BP01PT	2017-07-25 17:56:21	3770		189.6
BP01PT	2017-07-25 17:59:16	3771		189.8
BP01PT	2017-07-25 17:59:17	3772		190
BP01PT	2017-07-25 18:03:40	3774		190.2
BP01PT	2017-07-25 18:09:16	3775		190.4
BP01PT	2017-07-25 18:15:25	3777		190.6
BP01PT	2017-07-25 18:19:04	3778		190.8
BP01PT	2017-07-25 18:21:07	3779		191
BP01PT	2017-07-25 18:22:36	3780		191.2
BP01PT	2017-07-25 18:24:24	3781		191.4
BP01PT	2017-07-25 18:25:56	3782		191.6
BP01PT	2017-07-25 18:27:36	3783		191.8
BP01PT	2017-07-25 18:29:27	3784		192
BP01PT	2017-07-25 18:30:45	3786		192.2
BP01PT	2017-07-25 18:32:23	3787		192.4
BP01PT	2017-07-25 18:34:38	3788		192.6
BP01PT	2017-07-25 18:37:24	3789		192.8
BP01PT	2017-07-25 18:42:08	3790		193
BP01PT	2017-07-25 18:58:05	3792		193.2
BP01PT	2017-07-25 18:58:06	3793		193.4
BP01PT	2017-07-25 19:51:37	3798		193.6
BP01PT	2017-07-25 19:51:38	3799		193.8
BP01PT	2017-07-25 20:24:22	3802		194
BP01PT	2017-07-25 20:48:58	3805		194.2
BP01PT	2017-07-25 20:54:03	3806		194.4
BP01PT	2017-07-25 20:55:53	3807		194.6
BP01PT	2017-07-25 21:21:41	3810		194.8
BP01PT	2017-07-25 21:35:25	3812		195
BP01PT	2017-07-25 21:40:29	3813		195.2
BP01PT	2017-07-26 00:21:57	3825		195.4
BP01PT	2017-07-26 00:30:08	3827		195.6
BP01PT	2017-07-26 10:57:56	3869		195.8
BP01PT	2017-07-29 01:04:57	4119		196
BP01PT	2017-07-29 13:00:38	4168		196.2
BP01PT	2017-07-29 13:01:43	4169		196.4
BP01PT	2017-07-29 13:03:49	4170		196.6
BP01PT	2017-07-29 13:06:16	4171		196.8
BP01PT	2017-07-29 13:25:23	4173		197
BP01PT	2017-07-29 13:30:40	4175		197.2
BP01PT	2017-07-29 13:33:25	4176		197.4
BP01PT	2017-07-29 17:57:07	4194		197.6
BP01PT	2017-07-29 18:05:29	4196		197.8
BP01PT	2017-07-29 18:08:16	4197		198
BP01PT	2017-07-29 18:10:33	4198		198.2
BP01PT	2017-07-29 18:13:52	4199		198.4
BP01PT	2017-07-29 18:18:19	4201		198.6
BP01PT	2017-07-29 18:27:52	4202		198.8
BP01PT	2017-07-29 18:32:18	4204		199
BP01PT	2017-07-29 18:35:57	4205		199.2
BP01PT	2017-07-29 18:40:04	4206		199.4
BP01PT	2017-07-29 18:43:32	4207		199.6
BP01PT	2017-07-29 18:46:06	4209		199.8
BP01PT	2017-07-29 18:46:07	4210		200
BP01PT	2017-07-29 18:49:06	4211		200.2
BP01PT	2017-07-29 18:52:31	4212		200.4
BP01PT	2017-07-29 18:57:23	4213		200.6
BP01PT	2017-07-29 18:57:24	4214		200.8
BP01PT	2017-07-29 19:13:46	4216		201
BP01PT	2017-07-29 19:54:01	4220		201.2
BP01PT	2017-07-29 20:01:52	4222		201.4
BP01PT	2017-07-29 20:08:46	4223		201.6
BP01PT	2017-07-29 20:14:24	4224		201.8
BP01PT	2017-07-29 20:17:58	4226		202
BP01PT	2017-07-29 20:20:56	4227		202.2
BP01PT	2017-07-29 20:23:48	4228		202.4
BP01PT	2017-07-29 20:23:49	4229		202.6
BP01PT	2017-07-29 20:27:02	4230		202.8
BP01PT	2017-07-29 20:29:58	4231		203
BP01PT	2017-07-29 20:33:13	4233		203.2
BP01PT	2017-07-29 20:33:14	4234		203.4
BP01PT	2017-07-29 20:36:37	4235		203.6
BP01PT	2017-07-29 20:40:26	4236		203.8
BP01PT	2017-07-29 20:44:13	4237		204
BP01PT	2017-07-29 20:49:34	4239		204.2
BP01PT	2017-07-29 21:00:13	4241		204.4
BP01PT	2017-07-29 21:05:29	4242		204.6
BP01PT	2017-07-29 21:10:40	4243		204.8
BP01PT	2017-07-29 21:17:12	4245		205
BP01PT	2017-07-29 21:26:42	4246		205.2
BP01PT	2017-07-29 21:32:24	4248		205.4
BP01PT	2017-07-29 21:37:33	4249		205.6
BP01PT	2017-07-29 21:41:57	4250		205.8
BP01PT	2017-07-29 21:47:06	4252		206
BP01PT	2017-07-29 21:51:05	4253		206.2
BP01PT	2017-07-29 21:54:48	4254		206.4
BP01PT	2017-07-29 21:59:26	4255		206.6
BP01PT	2017-07-29 22:04:35	4257		206.8
BP01PT	2017-07-29 22:09:06	4258		207
BP01PT	2017-07-29 22:13:50	4259		207.2
BP01PT	2017-07-29 22:21:44	4261		207.4
BP01PT	2017-07-29 22:30:32	4263		207.6
BP01PT	2017-07-29 22:37:11	4264		207.8
BP01PT	2017-07-29 22:42:54	4265		208
BP01PT	2017-07-29 22:52:43	4267		208.2
BP01PT	2017-07-29 23:02:13	4269		208.4
BP01PT	2017-07-29 23:13:34	4270		208.6
BP01PT	2017-07-29 23:27:35	4272		208.8
BP01PT	2017-07-29 23:39:45	4274		209
BP01PT	2017-07-29 23:39:46	4275		209.2
BP01PT	2017-07-29 23:55:48	4277		209.4
BP01PT	2017-07-30 00:05:25	4279		209.6
BP01PT	2017-07-30 00:15:05	4281		209.8
BP01PT	2017-07-30 00:59:14	4284		210
BP01PT	2017-07-30 02:09:29	4290		210.2
BP01PT	2017-08-01 14:34:28	4533		210.4
BP01PT	2017-08-01 14:35:40	4534		210.6
BP01PT	2017-08-01 14:38:48	4535		210.8
BP01PT	2017-08-01 14:42:36	4536		211
BP01PT	2017-08-01 15:09:49	4539		211.2
[truncated: 1,851 more rows]
